# Supplementary material
Source: PubMed Central journal article supplement (PMC5816710)
Supplement: NIHMS922790-supplement-775_2017_1518_MOESM1_ESM.pdf [file NIHMS922790-supplement-775_2017_1518_MOESM1_ESM.pdf]

Supporting Information

***ACID-FACILITATED PRODUCT RELEASE FROM A Mo(IV) CENTER: RELEVANCE TO  
OXYGEN ATOM TRANSFER REACTIVITY OF MOLYBDENUM OXOTRANSFERASES***

*Feifei Li,<sup>1\*</sup> Marat R. Talipov,<sup>1\*</sup> Chao Dong,<sup>1</sup> Sofia Bali,<sup>1</sup> Keying Ding<sup>2</sup>*

1. Department of Chemistry and Biochemistry, New Mexico State University, Las Cruces NM 88003
2. Department of Chemistry, Middle Tennessee State University, Murfreesboro, TN 37132

**Figure S1** UV-vis spectra of adding pyridinium to complex **2**.....Page 2

**Figure S2** Eyring plot with 3-bromopyridinium.....Page 3

**Computational results for non-competitive I<sub>a</sub> pathways in the absence of HPyr<sup>+</sup>  
(including Figures S3-S5 and Scheme S1)**.....Pages 4 – 7

**Figures S6-S7 for alternative mechanisms**.....Pages 7 – 8

**Archive entries from the calculation files**.....Page 9 – 44

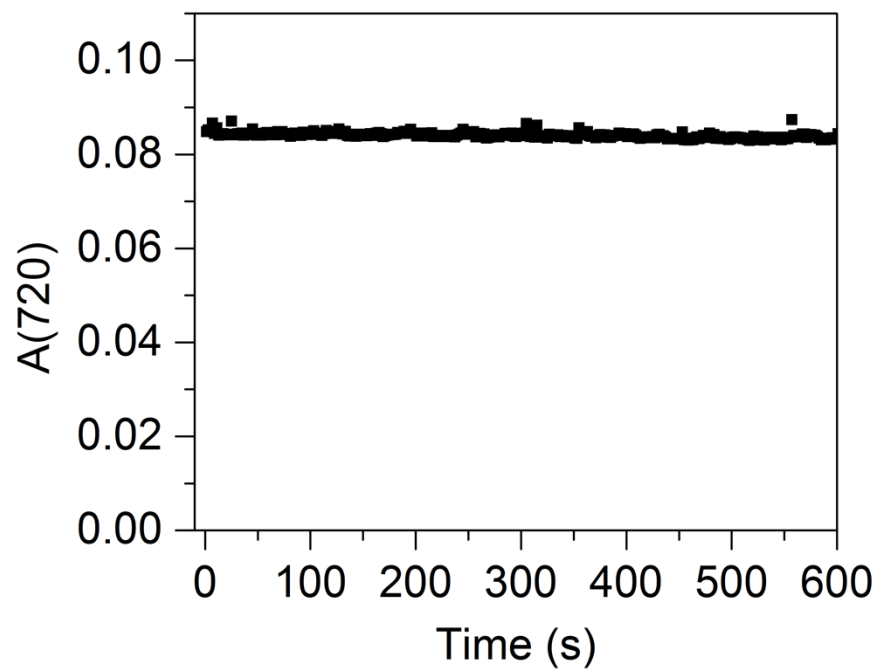

**Figure S1.** UV-visible spectra monitored at 720 nm after the addition of 10 equiv. pyridinium triflate to 1.0 mM [Tp\*Mo<sup>IV</sup>OCl(NCCH<sub>3</sub>)] (**2**) in acetonitrile at 10 °C as a control experiment.

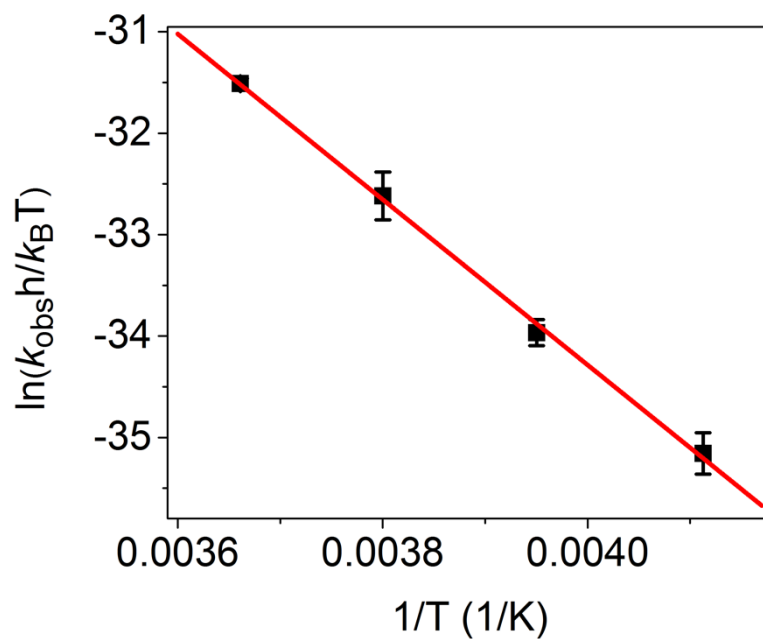

**Figure S2** The Eyring plot for the conversion of 1.0 mM [Tp\*Mo<sup>IV</sup>OCl(OPMe<sub>3</sub>)] (**1**) to **2** in CH<sub>3</sub>CN in the presence of 10 equiv. 3-bromopyridinium tosylate. Temperature range: -30 to 0°C.  $\Delta H^\ddagger = 68(2)$  kJ/mol.  $\Delta S^\ddagger = -14(7)$  J/mol. Error bars show one standard deviation from at least three independent measurements.

### Computational results for non-competitive I<sub>a</sub> pathways in the absence of HPyr<sup>+</sup>

An acetonitrile molecule can approach the molybdenum atom from the octahedral face formed by the chlorine and two Tp\* nitrogen atoms, denoted as the I<sub>a</sub>-NNCl pathway (Figure S3). The relaxed scan calculations showed that decrease of the distance between the acetonitrile molecule and the central molybdenum atom leads to the gradual lengthening and eventual dissociation of the Mo-Cl bond. The  $\Delta G^\ddagger$  for this process was found to be ~12 kJ/mol higher than that for the I<sub>a</sub>-NNO pathway presented in Figure 6. For this reason of higher activation energy, as well as the lack of the experimentally observed products associated with this pathway, we conclude that this reaction pathway does not play a major role in the solvolysis of **1**.

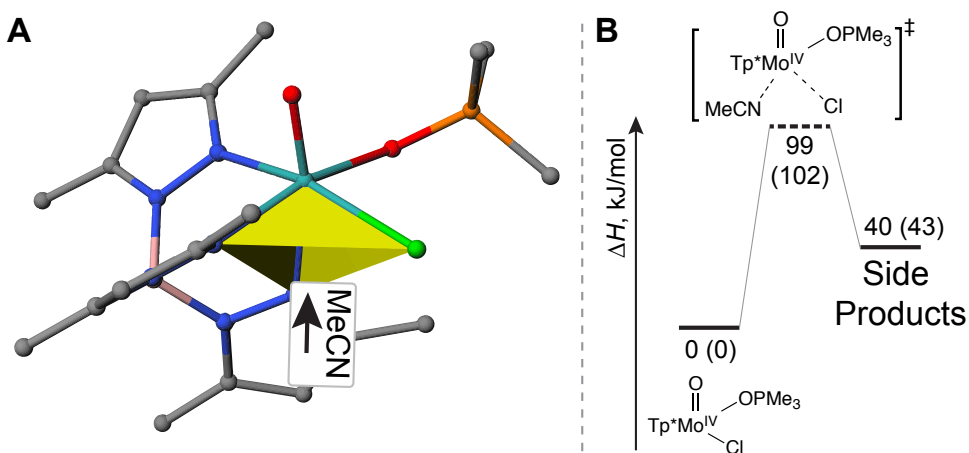

**Figure S3.** The I<sub>a</sub>-NNCl mechanism that leads to the side products.

We also investigated the reaction pathway in which an acetonitrile molecule approaches the molybdenum atom from the octahedral face formed by two Tp\* nitrogen atoms and the oxygen atom of the Mo=O moiety, denoted as the I<sub>a</sub>-NNOxo route (Figure

S4). This direction of MeCN attacking led to the dissociation of one of the Tp\*–Mo bonds. Due to the high energetic cost of more than 100 kJ/mol (estimated using relaxed

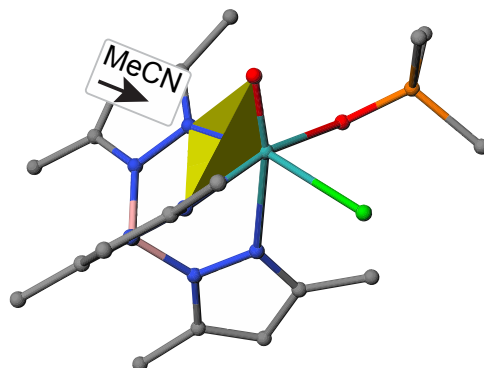

scan along the MeCN···Mo bond), this reaction channel was not further considered in this study.

**Figure S4.** An illustration of the direction of CH<sub>3</sub>CN attack in the I<sub>a</sub>-NNOxo mechanism.

As one of the Mo–N bonds in complex **1** is significantly longer than the other two Mo–N bonds (i.e. 2.5 vs 2.2 Å), we evaluated the bond energy of this weak bond and found that its dissociation requires 61 kJ/mol, which is significantly lower than the activation energy needed for the dissociation of the Mo–OPMe<sub>3</sub> bond. Accordingly, we inspected if such a formation of penta-coordinated Mo complex might be involved in facilitating the formation of the final products. We found that dissociation of the Me<sub>3</sub>PO–Mo bond in the complex shown in Scheme S1 (denoted as the I<sub>a</sub>-penta route) leads to the formation of the less stable product ( $\Delta H = 104$  kJ/mol,  $\Delta G = 104$  kJ/mol), as compared with the initial pre-reaction complex. Therefore, this pathway is expected to be noncompetitive with the dominant I<sub>a</sub>-NNO mechanism shown in Figure 6.

**Scheme S1.**

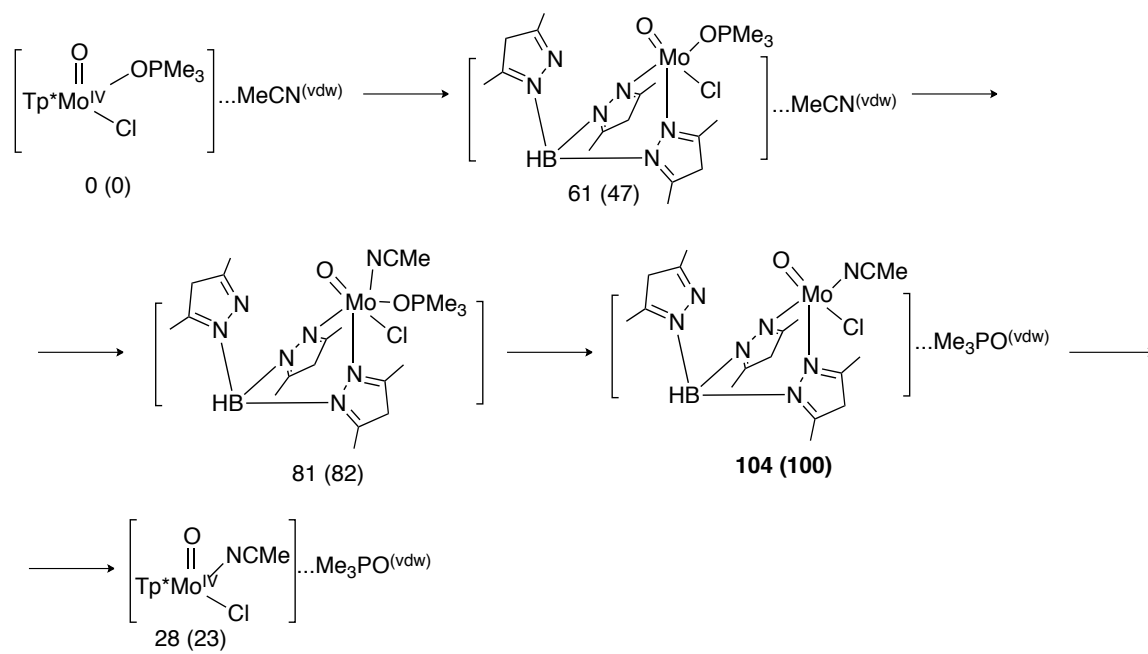

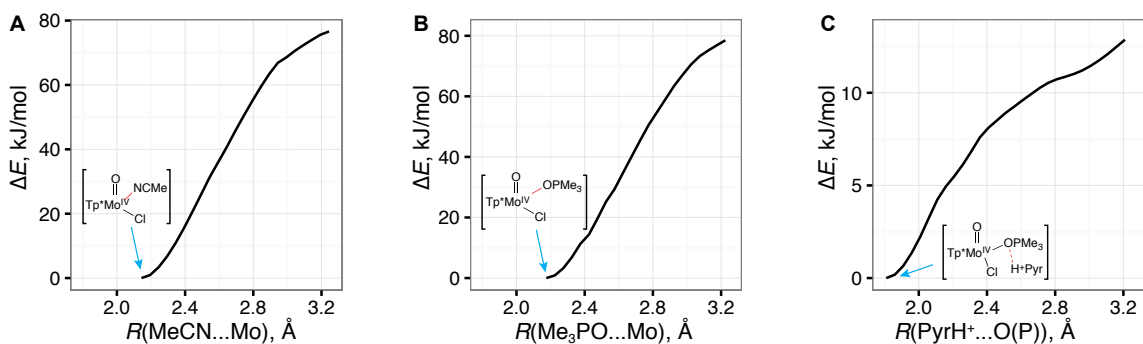

**Figure S5.** Electronic energy profiles for the dissociation of the MeCN $\cdots$ Mo bond in  $[\text{Tp}^*\text{MoOCl}(\text{MeCN})]$  (A),  $\text{Me}_3\text{PO}\cdots\text{Mo}$  bond in  $[\text{Tp}^*\text{MoOCl}(\text{Me}_3\text{PO})]$  (B), and  $\text{HPyr}^+\cdots\text{O}(\text{PMe}_3)$  bond in  $[\text{Tp}^*\text{MoOCl}(\text{Me}_3\text{PO})(\text{HPyr}^+)]$  (C), calculated using the relaxing scan technique at the M06L/def2-SV(P)+PCM(MeCN) level of theory.

### Computational details for alternative mechanisms in which $\text{HPyr}^+$ binds to the oxo ligand

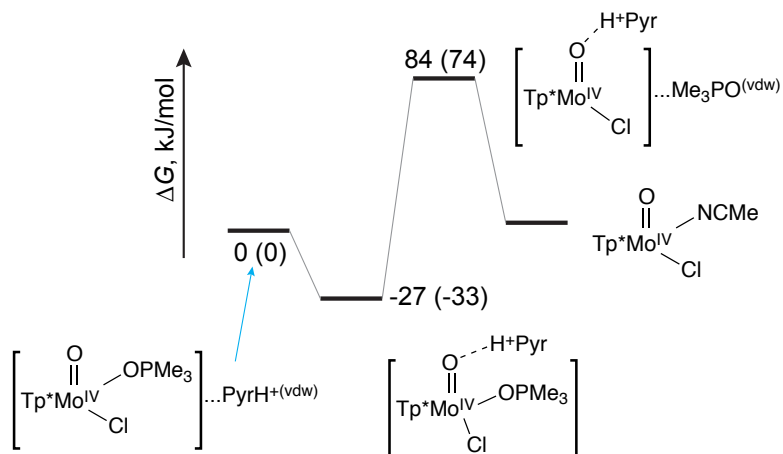

**Figure S6.** Alternative  $I_a$  mechanism in which  $\text{HPyr}^+$  is coordinated to the oxygen atom of the oxo ligand.

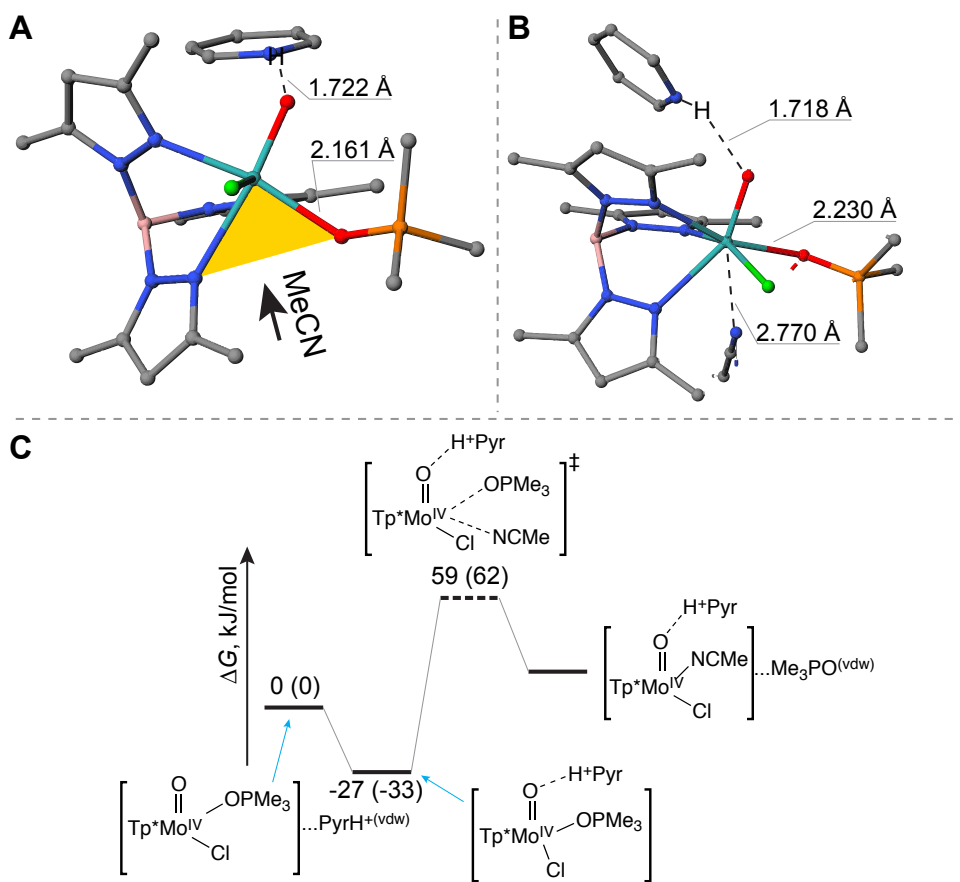

**Figure S7.** Alternative I<sub>a</sub> mechanism in which HPyr<sup>+</sup> is coordinated to the oxygen atom of the Mo=O moiety.



## Archive entries from the calculation files

The archive entries, formerly intended for the Browse Quantum Chemistry Database System, are organized as a simple list of data fields separated by backslash symbols, which is wrapped in 70-char text lines. The script 'Parse.Archive.pl', written in Perl, converts archive entry into human readable format. To use this script,

1. Check if Perl interpreter is installed on the system. To do this, run the command 'perl -v' in console. If console returns a message like 'command not found', please obtain and install a Perl interpreter ([www.perl.org/get.html](http://www.perl.org/get.html)); Perl is Open Source software licensed under GNU GPL).
2. Save the script code, listed below, as a file named 'Parse.Archive.pl'.
3. Select an archive entry of interest and save it as another file (e.g. 'B-Xb.txt').
4. Run the command 'perl Parse.Archive.pl B-Xb.txt > B-Xb-parsed.txt' in console. The parsed archive entry will be stored in the file 'B-Xb-parsed.txt' in this example. In some cases, absolute path to the Perl interpreter might need to be provided.

```
# --- Parse.Archive.pl ---

# Merge all strings in one line
my $s='';
while (<>) {chomp;$s .= $_}
$_ = $s;

# Some PDF viewers (like Mac OS's Preview) might substitute
# 'end of line' symbols by the white space symbols,
# To remove these extra white spaces, please uncomment the following lines:
# my $str_length = 70;
# my $index = $str_length;
# while (length($_) > $index) {
#     substr $_,$index,1,'';
#     $index += $str_length;
# }

# Replace all backslashes by new-line symbols
s:\\:\n:g;

# Print the resulting output
print;

# --- END ---
```

## Dissociative pathways

### Scheme S2

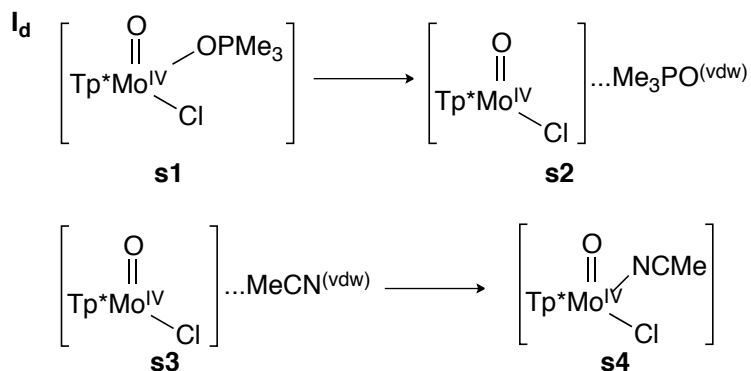

#### s1

```
1\1\GINC-JOKER-C5\Stability\RM06L\Gen\C18H31B1Cl1Mo1N6O2P1\SOFIBALI\10
-Feb-2017\0\#\#P M06L/chkbasis stable(opt) pop(nbo) scrf(check) guess(r
ead) geom(allcheck) nosym scf(fermi,xqc,maxcyc=200) int(grid=ultrafine
)\Title\0,1\Mo,0,4.0890139049,3.9953990579,3.9697960522\0,0,2.855751
2639,3.0229441042,4.6326302477\0,0,3.1799382107,4.6449090548,2.1039046
449\P,0,1.8088740237,5.318508132,1.8508500601\B,0,7.2400317644,2.89851
43123,3.9540017253\Cl,0,3.5439624924,6.3074203753,4.7912117422\N,0,6.1
100958285,4.9420220858,3.030326235\N,0,7.2708436562,4.2633140799,3.241
4789083\N,0,5.4738535726,3.6106056836,5.6121814842\N,0,6.7079819288,3.
0746913764,5.3898107621\N,0,5.0151245871,2.320682547,2.9077883715\N,0,
6.3057514729,1.9595201446,3.1524571599\C,0,1.876908757,7.1090345165,1.
6985721116\C,0,0.6083895315,4.9444184304,3.1340845946\C,0,1.1462503758
,4.6979210949,0.2991990464\C,0,8.3126417969,4.9048089004,2.6621822732\
C,0,7.8020351545,6.0427938322,2.048760024\C,0,6.4197462767,6.024310665
8,2.29610768\C,0,5.400730073,6.9879983383,1.8088517205\C,0,9.710329372
2,4.4068575827,2.7251987984\C,0,7.3127749444,2.7923363772,6.5666541339
\C,0,6.4261278824,3.1354880505,7.5821968078\C,0,5.2849527342,3.6440776
635,6.9459155271\C,0,4.0089498832,4.0877909995,7.5594794227\C,0,8.6817
61173,2.2251817504,6.65881287\C,0,6.6024775834,0.8194191897,2.48678287
01\C,0,5.4545327226,0.4243936466,1.8063327386\C,0,4.4834975902,1.39601
66809,2.0881696723\C,0,3.0847259306,1.4727229411,1.5934574123\C,0,7.94
24037743,0.1814711431,2.5285922481\H,0,5.3384533544,-0.460840565,1.179
473462\H,0,7.9260923419,-0.7689911311,1.9727132307\H,0,8.7205506155,0.
8213461303,2.075862305\H,0,8.2674408344,-0.0341817376,3.5614964093\H,0
,2.7487117509,0.4885414326,1.2291862345\H,0,2.9981340191,2.1862341868,
0.7550413416\H,0,2.3895066958,1.8108506768,2.3801388008\H,0,6.58907223
71,3.0292883521,8.6555745881\H,0,4.1586588015,4.3524982223,8.618897296
5\H,0,3.5843858871,4.9544906728,7.0272201808\H,0,3.2498982185,3.284365
3698,7.5238222658\H,0,8.3628299524,6.7934186759,1.489615541\H,0,10.388
7978865,5.1186841327,2.2294754947\H,0,10.0580009153,4.276109823,3.7650
021837\H,0,9.8266119867,3.4290670905,2.224995158\H,0,0.8724545663,7.50
18915715,1.4648320551\H,0,2.2271454729,7.5400513548,2.6500521727\H,0,2
.5677766286,7.3997624957,0.8908475145\H,0,-0.3732964767,5.381866656,2.
8851222043\H,0,0.9650716029,5.3588540152,4.0913840928\H,0,0.5039924686
,3.8517796895,3.2373989065\H,0,0.199158479,5.2020609136,0.0455770236\H
,0,1.8741806194,4.8782125725,-0.5091374352\H,0,0.9645559752,3.61348007
09,0.3738451808\H,0,8.3519198708,2.4244444352,3.9905771434\H,0,8.95467
68044,2.0660277608,7.7137144036\H,0,9.4385526367,2.8935211583,6.211367
```

3465\H,0,8.764763594,1.2551711327,6.1373687055\H,0,5.8677644016,7.9549  
885846,1.5590198638\H,0,4.6134416272,7.1540790347,2.5611148211\H,0,4.9  
078779701,6.6136844643,0.8928241636\\Version=ES64L-G09RevE.01\HF=-2077  
.1879172\RMSD=5.455e-09\Dipole=-0.7026516,-0.4552328,-2.9678367\Quadru  
pole=24.6744357,0.1732753,-24.847711,-22.2858332,-13.3572722,-34.48809  
67\PG=C01 [X(C18H31B1C11Mo1N6O2P1)]\\@

## s2

1\1\GINC-COMET-05-46\Stability\UM06L\Gen\C18H31B1C11Mo1N6O2P1\TALIPOVM  
\29-Jul-2017\0\#\#P M06L/chkbasis stable(opt) pop(nbo) scrf(check) gues  
s(read) geom(allcheck) nosym scf(fermi,xqc,maxcyc=200) int(grid=ultraf  
ine)\Title\0,1\Mo,0,4.1459218302,3.5977769238,3.9055246479\0,0,2.908  
209987,2.5558012327,4.4403240845\0,0,-1.0786834436,5.8419047555,1.0086  
077308\P,0,0.4249009716,5.9546547441,0.9241167721\B,0,7.3508727956,2.7  
470541268,4.0944951479\Cl,0,3.4481882365,5.9034434221,4.380283456\N,0,  
6.1003979487,4.6047683539,2.9543885445\N,0,7.3029382555,4.0564677396,3  
.2814313207\N,0,5.4070017996,3.400636061,5.5873665616\N,0,6.6995375728  
,2.9709821226,5.4798962553\N,0,5.2436718762,1.9134652711,3.0245793374\  
N,0,6.5480529855,1.6773747841,3.3266360864\C,0,1.0398218137,6.20651177  
73,-0.7610359175\C,0,1.2902317924,4.4762547084,1.5154567845\C,0,1.1011  
094181,7.3338253925,1.87986845\C,0,8.3125985705,4.754924899,2.71096109  
26\C,0,7.7365000574,5.7912406019,1.984079948\C,0,6.3503797128,5.659797  
4276,2.1600214326\C,0,5.275915744,6.5127400505,1.5880653068\C,0,9.7433  
476475,4.3968052857,2.8810000052\C,0,7.2466115816,2.8632627861,6.70958  
57824\C,0,6.2667123138,3.2070840466,7.6396322409\C,0,5.1276222145,3.54  
13319837,6.9022109819\C,0,3.781947094,3.9292486772,7.3870741045\C,0,8.  
6552198035,2.4546465945,6.9345066032\C,0,6.9580882775,0.5243432374,2.7  
481406715\C,0,5.8677890462,-0.0073234429,2.0660874792\C,0,4.8118352446  
,0.8957450318,2.2585266915\C,0,3.4133729733,0.8155679379,1.7673625476\  
C,0,8.3460890055,0.0123518006,2.8675711486\H,0,5.8442456122,-0.9355256  
978,1.4937650265\H,0,8.4325015947,-0.9675914062,2.3730992269\H,0,9.079  
5906738,0.6915301541,2.3977567375\H,0,8.6525560048,-0.1100242412,3.921  
2457241\H,0,3.3356275528,0.1060254105,0.9281984241\H,0,3.0437175809,1.  
797819085,1.4251085206\H,0,2.7213783502,0.4746685879,2.5585303852\H,0,  
6.3717616135,3.2152845363,8.7249499327\H,0,3.8166558053,4.1869811744,8  
.4572828066\H,0,3.382733493,4.7893731523,6.8231314764\H,0,3.0590329017  
,3.1019978484,7.26377757\H,0,8.2591920456,6.5455167537,1.3942189238\H,  
0,10.3815756959,5.129900812,2.3637583082\H,0,10.0423025931,4.377960922  
4,3.943610527\H,0,9.9732068395,3.3992829797,2.4665695187\H,0,2.1397483  
219,6.2915094042,-0.7911366954\H,0,0.7301895722,5.3603447683,-1.397579  
9377\H,0,0.6001904365,7.1284154554,-1.1780827304\H,0,2.3814730731,4.55  
0709519,1.3660218996\H,0,0.9161906129,3.5967564531,0.963710691\H,0,1.0  
844719644,4.3265698577,2.5888278965\H,0,2.2005980593,7.3903874046,1.81  
24735637\H,0,0.6665015164,8.2779934002,1.5090936658\H,0,0.8244274939,7  
.2155967476,2.9407757286\H,0,8.4946292065,2.3856308761,4.2398644405\H,  
0,8.8680392374,2.4105997987,8.013672416\H,0,9.3676695717,3.1635695385,  
6.4774505814\H,0,8.8703930306,1.4613664968,6.5033713357\H,0,5.60119471  
73,6.9532904471,0.6311421487\H,0,5.0095873975,7.3450285003,2.263480184  
9\H,0,4.350325305,5.9420999277,1.4100814042\\Version=ES64L-G09RevD.01\  
HF=-2077.1455744\S2=0.026083\S2-1=0.\S2A=0.000013\RMSD=6.610e-09\Dipol  
e=4.7571182,-1.4186628,-0.8942365\Quadrupole=45.577272,-32.1383731,-13  
.4388989,25.5251637,21.8636684,-19.1593093\PG=C01 [X(C18H31B1C11Mo1N6O  
2P1)]\\@

## s3

1\1\GINC-COMET-05-52\Stability\RM06L\Gen\C17H25B1C11Mo1N7O1\TALIPOVM\  
9-Jul-2017\0\#\#P M06L/chkbasis stable(opt) pop(nbo) scrf(check) guess(

```

read) geom(allcheck) nosym scf(fermi,xqc,maxcyc=200) int(grid=ultrafin
e)\Title\0,1\Mo,0,4.1500924479,4.0080430222,4.0493027709\0,0,2.87320
3179,3.016358012,4.583490448\B,0,7.2778060679,2.9019176396,3.828284716
7\Cl,0,3.7456536858,6.2898214003,4.8567189834\N,0,6.075475679,4.933497
4427,2.9753498605\N,0,7.2572039845,4.2737180358,3.1246749546\N,0,5.538
6444239,3.5370518385,5.5661867889\N,0,6.7866801319,3.0539122085,5.2881
251599\N,0,5.0111174121,2.3203658853,2.922036319\N,0,6.3153124291,1.96
26670491,3.0731329067\C,0,8.2502462181,4.9297861759,2.4803431588\C,0,7
.6821988978,6.052766323,1.8858473837\C,0,6.31981118,6.0168514353,2.217
9135464\C,0,5.2539892682,6.9687445029,1.8100834741\C,0,9.6520519268,4.
4455038356,2.450220329\C,0,7.445480027,2.8083943294,6.4406153324\C,0,6
.5843283391,3.1138524108,7.4937166442\C,0,5.3997848787,3.5702771152,6.
9104061176\C,0,4.1342815215,3.980638785,7.5633270375\C,0,8.8434842522,
2.3131976862,6.4828523972\C,0,6.5691297174,0.8250306495,2.3842457231\C
,0,5.3780790969,0.4331975236,1.7799152289\C,0,4.4251109612,1.397922324
9,2.1388110224\C,0,2.9882395127,1.475626649,1.7779749007\C,0,7.9135854
466,0.2006217665,2.3324399923\H,0,5.2225069659,-0.4456734947,1.1528887
018\H,0,7.8694370209,-0.7478959338,1.7746283341\H,0,8.6449375634,0.856
0763253,1.8265347404\H,0,8.3082796332,-0.0149867411,3.3409963418\H,0,2
.7833098544,0.9029766168,0.8589657542\H,0,2.6675621696,2.5200620242,1.
6191014858\H,0,2.3433463951,1.0663099455,2.5765474889\H,0,6.7969954303
,3.0179372175,8.5589179509\H,0,4.2790484904,4.0951344088,8.6490096241\
H,0,3.759462085,4.9318892257,7.1489600169\H,0,3.340478836,3.2277313972
,7.4055210361\H,0,8.1954154376,6.8025980474,1.2820442655\H,0,10.293951
861,5.1752727494,1.9322891249\H,0,10.0601897425,4.2925822686,3.4644738
185\H,0,9.7344148473,3.4832883529,1.9133696294\H,0,8.3963947776,2.4455
183533,3.8227383566\H,0,9.1630161156,2.1734429527,7.5269690507\H,0,9.5
44657198,3.0197953492,6.0052953463\H,0,8.9552291648,1.3476397779,5.959
3930073\H,0,5.548936077,7.504756317,0.8931298109\H,0,5.0552369242,7.72
5238034,2.5894785839\H,0,4.2972835244,6.4554245065,1.6144096727\C,0,5.
8715114451,3.5444856421,-0.202993551\C,0,7.2164001228,3.0178337882,-0.
1661586075\N,0,8.3004654409,2.5935200203,-0.1518455388\H,0,5.484669359
1,3.6890283471,0.8209761407\H,0,5.2013404731,2.8487446525,-0.735430899
6\H,0,5.8541323596,4.5165458027,-0.723984882\Version=ES64L-G09RevD.01
\HF=-1673.7334479\RMSD=3.398e-09\Dipole=0.7693653,-0.9816091,-1.242022
2\Quadrupole=15.9356093,-12.7092009,-3.2264085,-0.2145455,12.0957137,-
24.9587959\PG=C01 [X(C17H25B1Cl1Mo1N701)]\@

```

#### s4

```

I\1\GINC-JOKER-C7\Stability\UM06L\Gen\C17H25B1Cl1Mo1N701\SOFIBALI\10-F
eb-2017\0\#\#P M06L/chkbasis stable(opt) pop(nbo) scrf(check) guess(rea
d) geom(allcheck) nosym scf(fermi,xqc,maxcyc=200) int(grid=ultrafine)\
Title\0,1\Mo,0,4.0148329332,3.8007822548,4.3901984999\0,0,2.86635608
15,2.7797566339,5.1204683306\B,0,7.2005426721,2.9024834283,3.972265062
3\Cl,0,3.5937741274,6.0514722515,5.3727140877\N,0,5.8278587229,4.87316
32657,3.2173890101\N,0,7.0464189813,4.2674548545,3.2753002072\N,0,5.59
71173057,3.4504428335,5.8467156046\N,0,6.835945409,3.0288463188,5.4661
365835\N,0,4.9086192799,2.172117743,3.2108640763\N,0,6.240718185,1.901
5427645,3.2883089316\C,0,7.9738464406,4.9992044138,2.6139109579\C,0,7.
3266382264,6.1193409141,2.1066174197\C,0,5.984741603,6.0011168067,2.50
17814296\C,0,4.8663401079,6.9226246068,2.1723086664\C,0,9.399665456,4.
5988730185,2.5063735261\C,0,7.5927792526,2.7714583263,6.5568355204\C,0
,6.8054977132,3.0178837893,7.6777560802\C,0,5.5609288401,3.4411287693,
7.1942633605\C,0,4.3331299854,3.7618922568,7.963128825\C,0,9.002560120
3,2.3138910065,6.4762852398\C,0,6.5296428812,0.7850826793,2.5805214575
\C,0,5.3357307265,0.3123568822,2.0454377867\C,0,4.3425603337,1.2131696
336,2.4547013688\C,0,2.8912363187,1.1833141856,2.1378628805\C,0,7.9053

```

979289,0.2432906196,2.4495150399\H,0,5.2019990446,-0.5787950765,1.4308  
898815\H,0,7.886587119,-0.7033193037,1.887432725\H,0,8.5748982189,0.93  
90971039,1.9133525913\H,0,8.3689842415,0.0464210435,3.431939261\H,0,2.  
5847091896,0.168530603,1.8378520177\H,0,2.6458128956,1.8574697296,1.29  
67853906\H,0,2.272918409,1.4921718589,2.9962776439\H,0,7.0999407343,2.  
9017969192,8.7214878293\H,0,4.5748026219,3.926067858,9.0254059251\H,0,  
3.8297307792,4.6585026849,7.5658639713\H,0,3.6038146473,2.9324102431,7  
.9119688995\H,0,7.7734816306,6.9246018492,1.5216516403\H,0,9.966360808  
6,5.3629171493,1.9517304998\H,0,9.8732426783,4.4797440629,3.4965650912  
\H,0,9.5223787177,3.6381000087,1.9758954707\H,0,8.3386380641,2.5100824  
805,3.8675282992\H,0,9.4089663271,2.1642393007,7.4885547226\H,0,9.6470  
073756,3.0456974884,5.9584783079\H,0,9.0975501918,1.3597303656,5.92870  
39818\H,0,5.241157526,7.950712695,2.0370423511\H,0,4.0964957991,6.9306  
142904,2.9600474381\H,0,4.3779951293,6.6361468656,1.2219749635\N,0,2.8  
126020291,4.4440493787,2.7353330122\C,0,2.1402610692,4.7820235993,1.84  
83801739\C,0,1.3163276982,5.1749734787,0.7382652232\H,0,1.1116105936,4  
.3131843012,0.0808970006\H,0,1.8332828145,5.948462057,0.1469548675\H,0  
,0.3584240135,5.5911067082,1.0908508677\\Version=ES64L-G09RevE.01\HF=-  
1673.7560182\S2=0.\S2-1=0.\S2A=0.\RMSD=2.851e-09\Dipole=0.7982334,-1.1  
20364,-3.7400716\Quadrupole=43.8536005,-10.5864661,-33.2671344,-11.762  
6493,-8.237051,-44.4714158\PG=C01 [X(C17H25B1Cl1Mo1N7O1)]\@

### Scheme S3

I<sub>d</sub> (HPyr<sup>+</sup>)

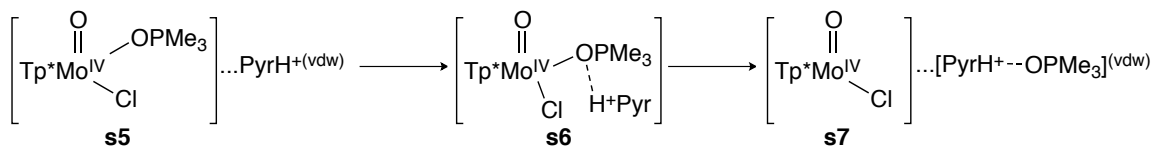

**s5**

```
1\1\GINC-JOKER-C5\Stability\RM06L\Gen\C18H31B1Cl1Mo1N6O2P1\SOFIBALI\10
-Feb-2017\0\#\#P M06L/chkbasis stable(opt) pop(nbo) scrf(check) guess(r
ead) geom(allcheck) nosym scf(fermi,xqc,maxcyc=200) int(grid=ultrafine
)\Title\0,1\Mo,0,4.0890139049,3.9953990579,3.9697960522\0,0,2.855751
2639,3.0229441042,4.6326302477\0,0,3.1799382107,4.6449090548,2.1039046
449\P,0,1.8088740237,5.318508132,1.8508500601\B,0,7.2400317644,2.89851
43123,3.9540017253\Cl,0,3.5439624924,6.3074203753,4.7912117422\N,0,6.1
100958285,4.9420220858,3.030326235\N,0,7.2708436562,4.2633140799,3.241
4789083\N,0,5.4738535726,3.6106056836,5.6121814842\N,0,6.7079819288,3.
0746913764,5.3898107621\N,0,5.0151245871,2.320682547,2.9077883715\N,0,
6.3057514729,1.9595201446,3.1524571599\C,0,1.876908757,7.1090345165,1.
6985721116\C,0,0.6083895315,4.9444184304,3.1340845946\C,0,1.1462503758
,4.6979210949,0.2991990464\C,0,8.3126417969,4.9048089004,2.6621822732\C
,0,7.8020351545,6.0427938322,2.048760024\C,0,6.4197462767,6.024310665
8,2.29610768\C,0,5.400730073,6.9879983383,1.8088517205\C,0,9.710329372
2,4.4068575827,2.7251987984\C,0,7.3127749444,2.7923363772,6.5666541339
\C,0,6.4261278824,3.1354880505,7.5821968078\C,0,5.2849527342,3.6440776
635,6.9459155271\C,0,4.0089498832,4.0877909995,7.5594794227\C,0,8.6817
61173,2.2251817504,6.65881287\C,0,6.6024775834,0.8194191897,2.48678287
01\C,0,5.4545327226,0.4243936466,1.8063327386\C,0,4.4834975902,1.39601
66809,2.0881696723\C,0,3.0847259306,1.4727229411,1.5934574123\C,0,7.94
24037743,0.1814711431,2.5285922481\H,0,5.3384533544,-0.460840565,1.179
473462\H,0,7.9260923419,-0.7689911311,1.9727132307\H,0,8.7205506155,0.
8213461303,2.075862305\H,0,8.2674408344,-0.0341817376,3.5614964093\H,0
,2.7487117509,0.4885414326,1.2291862345\H,0,2.9981340191,2.1862341868,
0.7550413416\H,0,2.3895066958,1.8108506768,2.3801388008\H,0,6.58907223
71,3.0292883521,8.6555745881\H,0,4.1586588015,4.3524982223,8.618897296
5\H,0,3.5843858871,4.9544906728,7.0272201808\H,0,3.2498982185,3.284365
3698,7.5238222658\H,0,8.3628299524,6.7934186759,1.489615541\H,0,10.388
7978865,5.1186841327,2.2294754947\H,0,10.0580009153,4.276109823,3.7650
021837\H,0,9.8266119867,3.4290670905,2.224995158\H,0,0.8724545663,7.50
18915715,1.4648320551\H,0,2.2271454729,7.5400513548,2.6500521727\H,0,2
.5677766286,7.3997624957,0.8908475145\H,0,-0.3732964767,5.381866656,2.
8851222043\H,0,0.9650716029,5.3588540152,4.0913840928\H,0,0.5039924686
,3.8517796895,3.2373989065\H,0,0.199158479,5.2020609136,0.0455770236\H
,0,1.8741806194,4.8782125725,-0.5091374352\H,0,0.9645559752,3.61348007
09,0.3738451808\H,0,8.3519198708,2.4244444352,3.9905771434\H,0,8.95467
68044,2.0660277608,7.7137144036\H,0,9.4385526367,2.8935211583,6.211367
3465\H,0,8.764763594,1.2551711327,6.1373687055\H,0,5.8677644016,7.9549
885846,1.5590198638\H,0,4.6134416272,7.1540790347,2.5611148211\H,0,4.9
078779701,6.6136844643,0.8928241636\\Version=ES64L-G09RevE.01\HF=-2077
.1879172\RMSD=5.455e-09\Dipole=-0.7026516,-0.4552328,-2.9678367\Quadru
pole=24.6744357,0.1732753,-24.847711,-22.2858332,-13.3572722,-34.48809
67\PG=C01 [X(C18H31B1Cl1Mo1N6O2P1)]\@
```

**s6**

```

I\1\GINC-JOKER-C8\Stability\RM06L\Gen\C23H37B1Cl1Mo1N7O2P1(1+)\SOFIBAL
I\16-Feb-2017\0\#\#P M06L/chkbasis stable(opt) pop(nbo) scrf(check) gue
ss(read) geom(allcheck) nosym scf(fermi,xqc,maxcyc=200) int(grid=ultra
fine)\Title\1,1\Mo,4.1131166495,3.9622748587,3.9770983771\0,2.846415
414,3.0233313367,4.6168407658\0,3.2955492491,4.530498323,1.9891924768\
P,1.8872594514,5.1533584716,1.7017402269\B,7.2486959106,2.8447295534,4
.0456065698\Cl,3.5558816434,6.2987016211,4.6572475629\N,6.1710460214,4
.9154326081,3.1049946145\N,7.2992239589,4.1662816119,3.2529252904\N,5.
4563715076,3.6482200081,5.6479152264\N,6.6981682398,3.1116970249,5.460
0148696\N,5.0363738736,2.2265850466,3.0118335811\N,6.3210406719,1.8651
016254,3.2892780505\C,1.9329889321,6.9342275315,1.4770321558\C,0.71847
69632,4.8051446133,3.0148923718\C,1.2397091345,4.4356118284,0.18913182
45\C,8.3575860519,4.7711775928,2.6642432172\C,7.8955988978,5.963673043
8,2.1180526617\C,6.5285289467,6.0218208957,2.4264521298\C,5.5733372073
,7.1028103558,2.0765906003\C,9.7214696916,4.185847439,2.6504403256\C,7
.3006605852,2.9110723714,6.6554482976\C,6.4060635294,3.3056407998,7.64
4893782\C,5.261967819,3.7615748647,6.9762934885\C,3.9778780058,4.22995
9929,7.5524748188\C,8.6762887885,2.3696692796,6.7886170067\C,6.6135487
534,0.6854129236,2.6942697577\C,5.4654224635,0.2608959988,2.0305232618
\C,4.4987607003,1.2527748982,2.2488123628\C,3.1086685207,1.3068053162,
1.7278818502\C,7.9531453003,0.0518352047,2.7721243137\H,5.3451918155,-
0.6587394441,1.4569143662\H,7.937718869,-0.9291390792,2.2728960461\H,8
.7278189757,0.6676664519,2.2808895207\H,8.2787231313,-0.1001479342,3.8
157351767\H,2.7326366374,0.2905727872,1.5285268547\H,3.0592677871,1.86
10121559,0.7724077744\H,2.4224207754,1.7986717582,2.435548031\H,6.5666
842779,3.2678750967,8.7229923373\H,4.1135656918,4.5459649251,8.5992987
743\H,3.5575686317,5.0686557566,6.9736443086\H,3.2221965808,3.42261616
38,7.5459144198\H,8.4800174855,6.702482961,1.5673962807\H,10.406858341
6,4.8341915039,2.0826032787\H,10.1320721956,4.0706637855,3.6691967323\
H,9.7377554596,3.1843088312,2.1851443133\H,0.9150039872,7.3076414457,1
.2724375366\H,2.3161883719,7.4027555151,2.3983446268\H,2.5815606123,7.
2062557504,0.6281002045\H,-0.2722678423,5.2105060208,2.747775378\H,1.0
686755996,5.274846414,3.948552316\H,0.6350611203,3.7173283743,3.169544
8447\H,0.26656751,4.8873109909,-0.0646883838\H,1.9366553613,4.61271240
52,-0.6463901972\H,1.1038632228,3.3493451139,0.3151521966\H,8.35604522
91,2.3677957748,4.1215351583\H,8.9513665608,2.295349071,7.8521185668\H
,9.4234312255,3.0117020213,6.2895715772\H,8.7706172538,1.3635679993,6.
3432631275\H,5.9106022955,7.6454138767,1.1767776894\H,5.4810732954,7.8
433292935,2.8911777095\H,4.561933406,6.7052976602,1.9078122911\N,5.442
3505404,4.3017690189,0.13420603\H,4.6177619962,4.2697589787,0.78245171
77\C,6.3976828378,3.3603105007,0.2342625187\H,6.2208189203,2.558663371
1,0.9534395828\C,5.5370587802,5.3338907638,-0.7241615115\C,7.528715067
2,3.4356081609,-0.5605835939\H,4.7072052236,6.0439429903,-0.7310220447
\C,6.6476710092,5.4555621974,-1.5405596206\C,7.6593948068,4.4979379878
,-1.4544086317\H,8.2977155602,2.6636085204,-0.47201973\H,6.7147467171,
6.2969529144,-2.2342537953\H,8.5482517935,4.5790141733,-2.0878556168\
Version=ES64L-G09RevE.01\HF=-2325.7163095\RMSD=2.869e-09\Dipole=0.4795
442,0.152454,-8.026691\Quadrupole=86.3199717,-1.751137,-84.5688346,66.
162707,-12.6340139,-35.0902095\PG=C01 [X(C23H37B1Cl1Mo1N7O2P1)]\@\

```

**s7**

```

I\1\GINC-COMET-05-59\Stability\UM06L\Gen\C23H37B1Cl1Mo1N7O2P1(1+)\TALI
POVM\29-Jul-2017\0\#\#P M06L/chkbasis stable(opt) pop(nbo) scrf(check)
guess(read) geom(allcheck) nosym scf(fermi,xqc,maxcyc=200) int(grid=ul
trafine)\Title\1,1\Mo,0,5.4391395537,4.7230462506,3.3031189536\0,0,3

```

.7776134849,4.4551682693,3.0128590369\0,0,0.3681319976,8.1844902899,1.  
5011620571\|P,0,1.4606419012,7.1849058927,1.8868148113\|B,0,7.4693773756  
,2.2119695416,4.0643666918\|C1,0,5.6596794656,6.9098252908,4.4352975359  
\|N,0,7.8135264731,4.6004916769,3.3855987761\|N,0,8.371635314,3.43813286  
58,3.8188155655\|N,0,5.5798781097,3.5774472836,5.0656740741\|N,0,6.45237  
94245,2.5325020203,5.1856606483\|N,0,5.9405085849,2.8959395497,2.198866  
6445\|N,0,6.70460489,1.9190544633,2.7555617021\|C,0,1.0473549562,5.49176  
4387,1.432984209\|C,0,1.7528038321,7.183910887,3.6608796869\|C,0,3.04011  
39733,7.5621218074,1.1007746471\|C,0,9.7212918053,3.541234562,3.8367968  
882\|C,0,10.0426587177,4.8200241628,3.3927216133\|C,0,8.8193506775,5.449  
5627701,3.1158205919\|C,0,8.5912581044,6.824985404,2.6007994348\|C,0,10.  
6110850257,2.4312871333,4.2611082177\|C,0,6.2936902918,1.9449352481,6.3  
906575183\|C,0,5.2641318496,2.6115891401,7.054102567\|C,0,4.840804251,3.  
6297336202,6.1966714619\|C,0,3.7369628567,4.6024690358,6.3750100326\|C,0  
,7.123788196,0.8041455147,6.8497087752\|C,0,6.7685039039,0.8511923557,1.  
.9257077381\|C,0,5.999923893,1.1506151572,0.8046920714\|C,0,5.501264342,  
2.445681993,1.0108140085\|C,0,4.6088064136,3.2549588052,0.1423656683\|C,  
0,7.5568889357,-0.3662025134,2.2406767672\|H,0,5.8276865658,0.507847057  
7,-0.0594671142\|H,0,8.6400619848,-0.1558570381,2.2909105354\|H,0,7.2705  
847944,-0.8037992549,3.2130493988\|H,0,7.4001468785,-1.1311505764,1.464  
5037768\|H,0,4.6228795199,2.8749836184,-0.8916836508\|H,0,4.9093830481,4.  
.3180496429,0.1226668831\|H,0,3.5613732114,3.2251995163,0.4933897103\|H,  
0,4.8718916157,2.383340212,8.0455554416\|H,0,2.8777599034,4.3538165631,  
5.7247214684\|H,0,3.3817121032,4.5967378034,7.417451861\|H,0,4.054885325  
1,5.6252705761,6.1096852334\|H,0,11.0430866125,5.2397091075,3.278370036  
8\|H,0,11.6614649388,2.7610242574,4.2495472819\|H,0,10.3767342737,2.0807  
20673,5.2814158256\|H,0,10.5264056114,1.5547135762,3.5946532452\|H,0,1.8  
258906574,4.7945190296,1.7863104426\|H,0,0.0811312413,5.2201706427,1.89  
06161414\|H,0,0.9489009433,5.4074458918,0.3374918768\|H,0,2.5291114627,6.  
.4466855873,3.9251899102\|H,0,0.8165801157,6.9336516828,4.1873902352\|H,  
0,2.0800341943,8.1860910116,3.9846648316\|H,0,3.8326852742,6.8696379753  
,1.4287418554\|H,0,2.9370200196,7.4957775719,0.0040548551\|H,0,3.3390825  
451,8.5913940544,1.3612968427\|H,0,8.1351468849,1.2554475057,4.38321431  
86\|H,0,6.8048337447,0.485108045,7.8538382858\|H,0,8.1941970353,1.069686  
7906,6.9023394266\|H,0,7.0416197997,-0.064499371,6.1734068275\|H,0,7.687  
3521713,6.8847824055,1.97194659\|H,0,9.4524894768,7.1587057088,1.999137  
5305\|H,0,8.4591205288,7.5528522249,3.4206251773\|H,0,-0.3437024378,8.16  
61455009,-4.0791499205\|C,0,-0.5000571284,8.7871330446,-3.1936609057\|C,  
0,-1.083862174,10.0513019251,-3.2842700868\|C,0,-1.2669654934,10.813888  
1357,-2.1301142155\|H,0,-1.7211271756,11.807078887,-2.1690971209\|C,0,-0.  
86103198,10.2909447817,-0.9126735873\|H,0,-0.9665660426,10.8181516999,  
0.038746062\|N,0,-0.3037566493,9.0721065103,-0.8546049323\|C,0,-0.115575  
3519,8.3179902699,-1.9478948713\|H,0,0.3458853175,7.339832106,-1.787543  
4031\|H,0,-1.3974486114,10.4431815972,-4.2571213328\|H,0,-0.0001133553,8.  
.6806201859,0.1123408392\|Version=ES64L-G09RevD.01\|HF=-2325.6750899\|S2  
=0.\|S2-1=0.\|S2A=0.\|RMSD=1.647e-09\|Dipole=-5.6528173,3.4044213,-6.74676  
3\|Quadrupole=-42.2548136,116.6476145,-74.3928008,-10.336368,18.8574332  
, -63.1702946\|PG=C01 [X(C23H37B1Cl1Mo1N7O2P1)]\|@



## Associative pathways

### Scheme S4

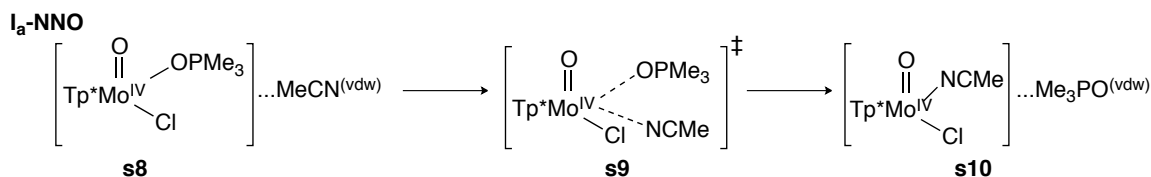

### s8

```

I\1\GINC-COMET-06-44\Stability\RM06L\Gen\C20H34B1Cl1Mo1N7O2P1\TALIPOVM
\29-Jul-2017\0\#\#P M06L/chkbasis stable(opt) pop(nbo) scrf(check) gues
s(read) geom(allcheck) nosym scf(fermi,xqc,maxcyc=200) int(grid=ultraf
ine)\Title\0,1\Mo,0,4.1175793682,3.9234240796,3.8893834586\0,0,2.895
7301589,2.9633711078,4.5859591877\0,0,3.1736386338,4.5181886965,2.0103
904747\P,0,1.795913565,5.1759628345,1.734941843\B,0,7.2892362774,2.857
442713,3.8327253276\Cl,0,3.5663054744,6.2523308114,4.6262246877\N,0,6.
1371938063,4.9037155532,2.9446663682\N,0,7.2954021929,4.2034076267,3.0
891091696\N,0,5.5381775391,3.59338445,5.5090709791\N,0,6.7754340979,3.
0679517177,5.2734359191\N,0,5.0429316619,2.2038615658,2.8934917242\N,0
,6.3539756354,1.8862468747,3.0794862752\C,0,1.8750759555,6.9506251359,
1.4614786738\C,0,0.6266220684,4.8738386517,3.0656156016\C,0,1.09631389
71,4.4653230567,0.2387960472\C,0,8.3257587173,4.8499888496,2.496001785
9\C,0,7.811746716,6.0188203634,1.9467051442\C,0,6.4413976244,6.0164097
189,2.2528419145\C,0,5.437022798,7.0513380776,1.90400905\C,0,9.7147640
455,4.3245771537,2.4849416281\C,0,7.4080797464,2.8277443519,6.44550986
89\C,0,6.5386918298,3.1877364384,7.4701066377\C,0,5.3775635474,3.66315
64205,6.8446612184\C,0,4.1087283792,4.1129424395,7.4684734791\C,0,8.78
69074575,2.2831116477,6.5254773497\C,0,6.6449959027,0.7233650488,2.452
3921757\C,0,5.4702734332,0.2632278218,1.8638700862\C,0,4.4890095276,1.
2186904488,2.1609692234\C,0,3.0511040906,1.2234293613,1.7957609289\C,0
,8.00547770754,0.1292451681,2.4432360024\H,0,5.3440441236,-0.653193477,
1.285921912\H,0,7.9981433492,-0.8256567887,1.8949917534\H,0,8.74346643
53,0.7919457416,1.9573612478\H,0,8.3777751728,-0.0683413703,3.46398777
32\H,0,2.855461171,0.5262335177,0.9651010877\H,0,2.7287773259,2.234770
307,1.500337683\H,0,2.4143666643,0.91745467,2.6462981278\H,0,6.7268371
239,3.1153498639,8.5421401075\H,0,4.276349021,4.4223680781,8.512979519
6\H,0,3.6611006732,4.9514670277,6.9101477082\H,0,3.3605779305,3.298626
4981,7.4813653929\H,0,8.3629221798,6.7803513356,1.3928282199\H,0,10.37
83864136,5.0184303428,1.9456402174\H,0,10.1178502817,4.1966175758,3.50
51119335\H,0,9.7822161001,3.3396439592,1.9898740228\H,0,0.8652155964,7
.3440209348,1.2526243052\H,0,2.2829348836,7.4414648581,2.3599437108\H,
0,2.5266951707,7.1576928596,0.5960113187\H,0,-0.3598658959,5.304796533
5,2.8242505056\H,0,1.0124840037,5.3280042548,3.9932584101\H,0,0.520053
4154,3.7870736555,3.2204170202\H,0,0.1200087408,4.9250263826,0.0114830
686\H,0,1.7823751787,4.6472207196,-0.6049910974\H,0,0.9558132217,3.379
0615759,0.3615054272\H,0,8.4063054554,2.3964201155,3.8656543752\H,0,9.
0824665443,2.1564752309,7.5786587182\H,0,9.5245618387,2.9502965637,6.0
454693882\H,0,8.8742280073,1.3007835514,6.0283756587\H,0,5.7241861635,
7.5755645192,0.9771077615\H,0,5.3392568781,7.8097868949,2.7021288505\H
,0,4.4462744574,6.5991891774,1.7647098236\C,0,5.5385940772,3.778839794
8,-0.1807930298\C,0,4.7460958338,4.8726483416,-0.6888408256\N,0,4.0976
730582,5.7502231749,-1.0950767204\H,0,6.6086268461,4.0480406994,-0.166
1339304\H,0,5.4096143533,2.8828226432,-0.8117183794\H,0,5.2204659823,3
.5428220523,0.8493917031\Version=ES64L-G09RevD.01\HF=-2209.8376741\RM

```

SD=5.554e-09\Dipole=0.3265926,-1.8741642,-2.0768166\Quadrupole=45.5058743,-23.7649848,-21.7408895,-24.1516539,-6.5671204,-24.0229411\PG=C01[X(C20H34B1Cl1Mo1N7O2P1)]\@

**s9 (Imaginary frequency: 46.0i cm<sup>-1</sup>)**

1\1\GINC-C01\Stability\RM06L\Gen\C20H34B1Cl1Mo1N7O2P1\SOFIBALI\13-Mar-2017\0\#\#P M06L/chkbasis stable(opt) pop(nbo) scrf(check) guess(read) geom(allcheck) nosym scf(fermi,xqc,maxcyc=200) int(grid=ultrafine)\Title\0,1\Mo,0,4.229505219,4.1147417681,3.4586312716\0,0,3.0631250524,3.2910532717,4.3776754779\0,0,2.5091529583,4.2704425246,1.9425023607\0,0,1.1372275192,4.9415943584,2.0262812628\B,0,7.3399185553,2.8200955548,3.8686360661\Cl,0,3.657759224,6.5006766152,3.9829589259\N,0,6.5424158475,5.0628431205,3.0753460752\N,0,7.5739083006,4.1893748676,3.2126955782\N,0,5.4883334754,3.7295515126,5.2913233022\N,0,6.665416158,3.0558096897,5.2277401981\N,0,5.1807126893,2.3372661841,2.6074489406\N,0,6.4407055385,1.9457000924,2.9590268518\C,0,1.1451682125,6.6384408527,1.4169955932\C,0,0.4170704781,4.9766037201,3.6773012738\C,0,-0.0277602898,4.0380362445,0.9875480873\C,0,8.7290402082,4.7210189617,2.7454831125\C,0,8.426575342,5.9939940504,2.2807610016\C,0,7.0493763414,6.1688426942,2.5050861908\C,0,6.2545040156,7.3751309604,2.1536456951\C,0,10.0297205118,4.0042726489,2.7803242023\C,0,7.1287131834,2.7924480549,6.473891651\C,0,6.1985065791,3.3011863761,7.3715877272\C,0,5.1822534767,3.8791280089,6.5899661118\C,0,3.9274871826,4.5245539382,7.0537433679\C,0,8.4159521093,2.0958621526,6.7258595697\C,0,6.7534121372,0.7825492388,2.3457762002\C,0,5.6518412772,0.4030543526,1.5833452121\C,0,4.6895573813,1.4024196138,1.7702744555\C,0,3.3283007028,1.4752714228,1.1836865671\C,0,8.0570809631,0.0912783002,2.5141744321\H,0,5.5580590351,-0.4955387521,0.9718922132\H,0,8.0583364592,-0.851582496,1.945041124\H,0,8.9036299646,0.7020219393,2.1549723277\H,0,8.264613139,-0.1505323165,3.5713715443\H,0,3.1161927119,0.5610970894,0.6057678806\H,0,3.2152551049,2.3497722766,0.5210397115\H,0,2.5541950489,1.5900400798,1.9613945748\H,0,6.2505551124,3.2623667608,8.4608383947\H,0,4.0528069448,4.9268339385,8.0730892263\H,0,3.6203356007,5.3412091595,6.3798500839\H,0,3.0912998403,3.8021839687,7.0846338314\H,0,9.1182693146,6.7131331994,1.8382398395\H,0,10.8193081124,4.6314846849,2.3369342288\H,0,10.3388704372,3.7531320525,3.8108983349\H,0,10.0003532137,3.0547606139,2.2171864672\H,0,0.1276164245,7.0644579415,1.3947824451\H,0,1.7889972946,7.2465159551,2.0733118479\H,0,1.5624997156,6.6551785351,0.3959382747\H,0,-0.5821205727,5.444674605,3.6572672964\H,0,1.0817674072,5.5477250825,4.3459186296\H,0,0.3297936602,3.947310194,4.0613252706\H,0,-1.0271796526,4.5046419966,0.996698145\H,0,0.3454566795,4.0136432672,-0.0499956281\H,0,-0.1144870463,2.9999677403,1.3501167698\H,0,8.3967649197,2.2533557342,4.0272866178\H,0,8.5638242767,1.9517027389,7.8077823654\H,0,9.2798413053,2.6678652065,6.3415254884\H,0,8.4531072326,1.1028332412,6.2435128054\H,0,6.8416829479,8.0262658917,1.484219721\H,0,5.9811132764,7.9671626203,3.0438549361\H,0,5.3092350263,7.1136080745,1.6518055258\C,0,5.9522298303,3.8707111658,-1.2946499549\C,0,5.372911829,4.3434993778,-0.060416397\N,0,4.9129671756,4.6969774622,0.9460515138\H,0,5.6572255446,4.5152874672,-2.1382967451\H,0,5.6106087497,2.8436744792,-1.5065119794\H,0,7.0524755861,3.866515873,-1.2271364932\Version=ES64L-G09RevE.01\HF=-2209.8054511\RMSD=2.954e-09\Dipole=-0.2477165,-1.5815924,-4.0971341\Quadrupole=38.0534653,-19.0746061,-18.9788592,-26.818744,-32.9969849,-42.9858886\PG=C01[X(C20H34B1Cl1Mo1N7O2P1)]\@

**s10**

1\1\GINC-COMET-06-54\Stability\RM06L\Gen\C20H34B1Cl1Mo1N7O2P1\TALIPVM

```
\28-Jul-2017\0\#\#P M06L/chkbasis stable(opt) pop(nbo) scrf(check) gues
s(read) geom(allcheck) nosym scf(fermi,xqc,maxcyc=200) int(grid=ultraf
ine)\Title\0,1\Mo,0,4.7175835799,3.7788132059,3.2570325832\0,0,3.295
6603287,2.8944466978,3.5623893048\0,0,1.1093904507,4.0929422024,0.6803
24964\P,0,0.5273157558,5.2487187125,1.4711037478\B,0,7.7400249678,2.69
40403328,4.1582023043\C1,0,4.1442854554,6.1409385486,3.8462029823\N,0,
6.9186054115,4.6425568752,2.7956036812\N,0,7.9729169186,3.9903349134,3
.3585449139\N,0,5.5968969094,3.492200404,5.2295289246\N,0,6.8513823322
,2.9846401913,5.3857244583\N,0,5.8530533949,2.0093870843,2.6276637272\
N,0,7.0281646485,1.6795147074,3.2315293916\C,0,1.4121645713,6.80930115
97,1.2308105479\C,0,0.5187513256,4.9908978965,3.2608286439\C,0,-1.1934
584558,5.5985459918,1.0300632543\C,0,9.1372478817,4.6028026095,3.03882
09516\C,0,8.8203743336,5.6910426098,2.2345899439\C,0,7.4226068947,5.67
80414515,2.1010884444\C,0,6.5867085349,6.6084561098,1.2977594455\C,0,1
0.4620740863,4.1262749787,3.5105683321\C,0,7.11679259,2.8029867589,6.6
992931788\C,0,5.9838044255,3.1882210703,7.4102487575\C,0,5.0507232948,
3.6136606176,6.4556185957\C,0,3.6493483628,4.0560856976,6.6645743709\C
,0,8.414337164,2.2830886694,7.1987244163\C,0,7.4698091668,0.4885481138
,2.7647646843\C,0,6.534220126,0.0307142568,1.8425256434\C,0,5.53895530
32,1.0162428526,1.7757743114\C,0,4.321746322,1.0383936895,0.9236123486
\C,0,8.7411472521,-0.1335435005,3.2121785192\H,0,6.5705452598,-0.90566
8437,1.2843580463\H,0,8.8582938656,-1.1272849853,2.7527057444\H,0,9.62
01078717,0.4728473374,2.9301920003\H,0,8.7775538508,-0.2588037059,4.30
85079081\H,0,4.4863053596,1.6243290671,0.0006639186\H,0,3.4580471558,1
.4844445001,1.4435397075\H,0,4.0505854312,0.0165616803,0.6132841337\H,
0,5.8509012436,3.1606333414,8.4924530057\H,0,3.4726167885,4.2891643547
,7.7267589046\H,0,3.4090862297,4.9449774102,6.0580182602\H,0,2.9342296
849,3.2644985059,6.3732641665\H,0,9.5180057771,6.4073832205,1.79812255
54\H,0,11.2553094884,4.8041838479,3.1587765311\H,0,10.5192909724,4.081
9393389,4.6122881779\H,0,10.6959021756,3.113427341,3.1375727691\H,0,0.
9362274354,7.6324268052,1.7915804684\H,0,2.4504525891,6.6979738194,1.5
917181976\H,0,1.4235967478,7.0750024821,0.1596614563\H,0,-0.0026465665
,5.8135692337,3.7802094367\H,0,1.5569151835,4.9360964673,3.6305891452\
H,0,0.0093641203,4.0405921235,3.4949446022\H,0,-1.6033358946,6.4459654
662,1.6052892415\H,0,-1.2578129221,5.8337344448,-0.0457938412\H,0,-1.8
111332236,4.7051484922,1.2234401477\H,0,8.7972512599,2.2372969748,4.52
43733718\H,0,8.3974860995,2.2180232775,8.2976819652\H,0,9.2590079773,2
.9335652212,6.9114830959\H,0,8.6369188236,1.2764805682,6.8029907998\H,
0,6.4455679797,6.2328384016,0.266737814\H,0,7.0774635008,7.5922734631,
1.2137552805\H,0,5.5883464571,6.7491127017,1.7417889675\C,0,3.51163684
74,4.9117065869,-1.1644917782\C,0,3.9503300466,4.6011959606,0.16696889
44\N,0,4.3061422048,4.3360610073,1.2415982235\H,0,2.424391174,4.725086
783,-1.2021809086\H,0,4.0216887069,4.28021412,-1.9116335037\H,0,3.7061
129654,5.9719088734,-1.3996552787\Version=ES64L-G09RevD.01\HF=-2209.8
240837\RMSD=8.388e-09\Dipole=0.9604359,0.0041227,-1.8621713\Quadrupole
=28.682919,-12.6351672,-16.0477518,-12.1642449,-3.8554996,-26.9203788\
PG=C01 [X(C20H34B1C11Mo1N702P1)]\@
```

## Scheme S5

I<sub>a</sub>-ClOO

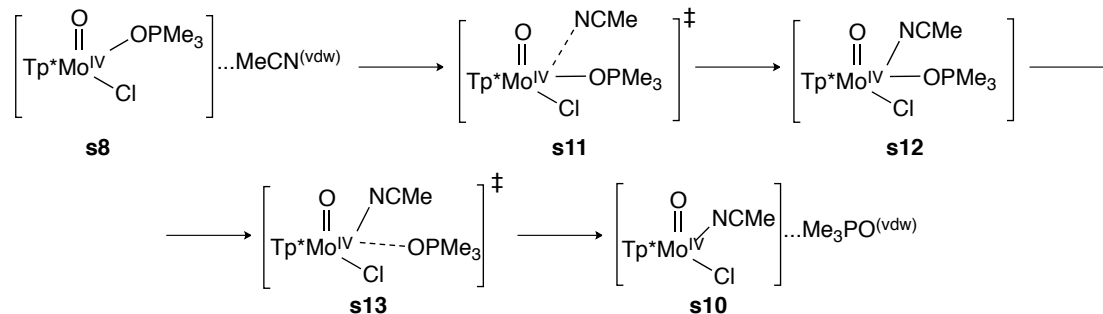

### s11 (Imaginary frequency: 36.4i cm<sup>-1</sup>)

```

1\1\GINC-COMET-07-19\Stability\RM06L\Gen\C20H34B1Cl1Mo1N7O2P1\TALIPOVM
\12-Aug-2017\0\#\#P M06L/chkbasis stable(opt) pop(nbo) scrf(check) gues
s(read) geom(allcheck) nosym scf(fermi,xqc,maxcyc=200) int(grid=ultraf
ine)\Title\0,1\Mo,0,3.1747406155,5.290165763,4.8058500876\0,0,2.2537
885394,4.7872212383,3.4648597818\0,0,4.6629017137,4.5002666728,6.34062
25989\P,0,5.9441192405,3.7294449698,6.6602006728\B,0,1.1947449554,6.99
910625,6.9861847196\Cl,0,5.1771089553,6.2488536147,3.6090668993\N,0,3.
668196021,7.0146051897,6.6120396928\N,0,2.6267469792,7.3388426141,7.42
09533875\N,0,1.834519529,7.1011482687,4.5583700372\N,0,1.0108964324,7.
5224238889,5.552535994\N,0,1.7473003307,4.6081121954,6.3278628132\N,0
,0.9652713519,5.47067232,7.0395396319\C,0,7.2449938916,3.8685444652,5.
4202742299\C,0,5.674255272,1.9622805249,6.9102619574\C,0,6.6446700039,
4.3192461441,8.212220152\C,0,3.0410600416,8.0709564294,8.4837251399\C,
0,4.4143165958,8.2251629812,8.3538008101\C,0,4.7633045947,7.5564871044
,7.1653693631\C,0,6.1182753501,7.4933876531,6.5598213351\C,0,2.1174690
423,8.5765020693,9.5317508494\C,0,0.1696609128,8.4819589529,5.09562742
29\C,0,0.4542762776,8.6679327897,3.749188177\C,0,1.5015204163,7.778765
8204,3.4483980288\C,0,2.1423854053,7.5443876251,2.1295596578\C,0,-0.82
84917034,9.161614682,5.960416492\C,0,0.0821968585,4.7825794447,7.79632
23421\C,0,0.293368308,3.4273182056,7.5568321128\C,0,1.3445984071,3.360
4406609,6.635462863\C,0,1.9553450614,2.1537349303,6.0286128319\C,0,-0.
9026108435,5.4307908942,8.6996034095\H,0,-0.2512592426,2.5916780367,7.
9985395594\H,0,-1.5298187772,4.6654615021,9.1831399434\H,0,-0.41360027
24,6.0181650948,9.4963685949\H,0,-1.5701800775,6.1230531049,8.15741107
85\H,0,1.7448870306,2.0883722088,4.9460563276\H,0,1.5660900208,1.24117
58643,6.5082772345\H,0,3.051872885,2.1703026591,6.1324580451\H,0,-0.03
45493805,9.364579093,3.0662251295\H,0,2.081868876,8.4510068776,1.50394
30871\H,0,3.198810048,7.2505692729,2.2400718612\H,0,1.6368626969,6.730
3485036,1.5785006085\H,0,5.0820029097,8.7649153181,9.0279507266\H,0,2.
6860049887,9.0912713263,10.322526877\H,0,1.3814668908,9.2944771192,9.1
266552677\H,0,1.5395883546,7.7640561124,10.0069056725\H,0,8.1325589928
,3.2937579421,5.7354077591\H,0,6.8883472739,3.4859156158,4.4514151758\
H,0,7.5282811225,4.9238347111,5.2817423874\H,0,6.6128124218,1.47178479
8,7.2203317385\H,0,5.3145275215,1.4825692274,5.986140879\H,0,4.9217506
614,1.8119272457,7.7022587136\H,0,7.5334990724,3.7319875265,8.49746047
73\H,0,6.9310368997,5.3790729752,8.12065751\H,0,5.886860569,4.23078475
84,9.0085314157\H,0,0.3990428243,7.5361003893,7.7225061015\H,0,-1.4188
795061,9.8771403478,5.3664583383\H,0,-0.3515086335,9.7213592696,6.7851
738896\H,0,-1.5312976739,8.448013118,6.4259864303\H,0,6.8930807638,7.6
701423292,7.3253402165\H,0,6.248762223,8.2635238391,5.7780077214\H,0,6

```

.2978428521,6.530716837,6.062454367\C,0,5.133556626,1.2036824717,2.5831501383\C,0,4.6031437458,2.275662688,3.3897350672\N,0,4.1866940639,3.1364702949,4.0498817441\H,0,5.5871017274,0.4288101075,3.2229723118\H,0,5.9047450458,1.5832838545,1.8932663287\H,0,4.3319441444,0.7374669369,1.9879569563\\Version=ES64L-G09RevD.01\HF=-2209.8077165\RMSD=2.541e-09\Dipole=1.9620346,-4.3191107,2.7430639\Quadrupole=29.4974057,-76.2306767,46.733271,-31.9647508,36.7202485,-5.6288973\PG=C01 [X(C20H34B1Cl1Mo1N702P1)]\@\

## s12

1\1\GINC-JOKER-C8\Stability\RM06L\Gen\C20H34B1Cl1Mo1N702P1\SOFIBALI\13-Apr-2017\0\#\#P M06L/chkbasis stable(opt) pop(nbo) scrf(check) guess(read) geom(allcheck) nosym scf(fermi,xqc,maxcyc=200) int(grid=ultrafine)\Title\0,1\Mo,0,3.1551145285,5.2735758896,4.7637759496\0,0,2.1955817809,4.8142638784,3.4324046546\0,0,4.6744842542,4.5149603579,6.3287625754\0,0,5.9573130908,3.7490870098,6.648706519\B,0,1.2111294536,6.9774167033,6.9893749164\Cl,0,5.1392582529,6.2301160226,3.5386005424\N,0,3.6751446394,7.0062470743,6.5578261079\N,0,2.652346006,7.311604141,7.3969614216\N,0,1.8059420228,7.1090329584,4.5560511205\N,0,0.9986924264,7.5185076704,5.5671211875\N,0,1.7452682539,4.584524361,6.3039512732\N,0,0.9792240258,5.4481683438,7.0329723512\C,0,7.2419300756,3.8637614556,5.388168871\C,0,5.6872436358,1.9868941544,6.9337800909\C,0,6.6825652339,4.3636154368,8.1799647313\C,0,3.0874927331,8.0352759191,8.457319517\C,0,4.4555125855,8.2032965629,8.2936795179\C,0,4.7793472824,7.5516971094,7.0887786628\C,0,6.1197951475,7.5065050553,6.4501484396\C,0,2.1865811646,8.5217585645,9.5337466738\C,0,0.1515998809,8.4853960231,5.1363504583\C,0,0.4167030896,8.689063197,3.7885389262\C,0,1.4580696687,7.8015977005,3.4609161546\C,0,2.0815574234,7.5847378413,2.1304208959\C,0,-0.8321610008,9.1545635434,6.0255432444\C,0,0.1018395535,4.7613663449,7.7974848982\C,0,0.299827593,3.4065058493,7.5464752706\C,0,1.3369413031,3.3377868489,6.6099425513\C,0,1.9252832336,2.1246411024,5.993161676\C,0,-0.8671386125,5.4082093813,8.7187487021\H,0,-0.2446053451,2.5717089859,7.9899752321\H,0,-1.4897307428,4.6419423154,9.2067845723\H,0,-0.3645705019,5.9892097414,9.5116765357\H,0,-1.540498738,6.1056012406,8.1906313156\H,0,1.7421347075,2.0879922705,4.9046413273\H,0,1.4926470099,1.2171798082,6.4442894219\H,0,3.0184349856,2.0979520934,6.1285285637\H,0,-0.0806273679,9.3961375303,3.1225383166\H,0,2.0355170555,8.5068138196,1.526351393\H,0,3.1324344254,7.2661916899,2.223830032\H,0,1.5532311256,6.7957299374,1.5645145743\H,0,5.135849317,8.7417568628,8.9561574848\H,0,2.7715435746,9.0255066719,10.3196615746\H,0,1.4399805074,9.2441955571,9.1567878432\H,0,1.6213175519,7.7003746181,10.0086756603\H,0,7.527843639,4.9159137746,5.2314810878\H,0,8.1321667047,3.2899224053,5.6971930685\H,0,6.8715250136,3.4714534388,4.4281878655\H,0,6.6270383833,1.4967652103,7.2405149179\H,0,5.3131618226,1.4910066013,6.0240569261\H,0,4.9433105552,1.8540493185,7.7369851959\H,0,7.5729219094,3.7777941248,8.4635193921\H,0,6.9719143223,5.4205164314,8.0654343485\H,0,5.9355209133,4.2929145863,8.9881781571\H,0,0.4321016256,7.5069448348,7.7486153787\H,0,-1.429651982,9.8799855882,5.4509657938\H,0,-0.3418282077,9.7013016592,6.8512510702\H,0,-1.5300207837,8.436097919,6.4910332856\H,0,6.9071450983,7.7306016651,7.1899363261\H,0,6.2081534654,8.2500298007,5.6376084897\H,0,6.3164015311,6.5322844427,5.9822339464\C,0,5.104115733,1.2231069371,2.7307548346\C,0,4.5452047328,2.3267937123,3.4719648939\N,0,4.1057370248,3.2143091482,4.0796426792\H,0,5.7939100681,1.5873858759,1.9517511014\H,0,4.303944156,0.6423224756,2.2439291645\H,0,5.6609749844,0.549350407,3.4029023279\\Version=ES64L-G09RevE.01\HF=-2209.8077753\RMSD=3.992e-09\Dipole=2.0626376,-4.3881341,2.8687705\Quadrupole=30.3653023,-78.0006089,47.6353066,-30.7496362,38.5309867,-5.4493091\PG=C01 [X(C20H3

4B1Cl1Mo1N702P1)]\@\

**s13 (Imaginary frequency: 86.0 *i* cm<sup>-1</sup>)**

```
1\1\GINC-COMET-08-48\Stability\RM06L\Gen\C20H34B1Cl1Mo1N702P1\TALIPOVM
\04-Aug-2017\0\#\P M06L/chkbasis stable(opt) pop(nbo) scrf(check) gues
s(read) geom(allcheck) nosym scf(fermi,xqc,maxcyc=200) int(grid=ultraf
ine)\Title\0,1\Mo,0,2.9987176572,5.4269799377,4.4860061135\0,0,1.998
1380517,4.9153189893,3.2121566803\0,0,4.6763227287,4.3674052049,6.5659
126519\0,0,5.9012712895,3.5772764143,6.9877240347\B,0,1.2223317364,7.0
227006726,6.8887760151\Cl,0,4.8298385163,6.5456793772,3.1911186061\N,0
,3.6596739572,6.9629084883,6.2890133432\N,0,2.6969348022,7.3389801138,
7.1721549226\N,0,1.5818873507,7.2108393881,4.4211772334\N,0,0.87176924
44,7.5981317354,5.5102004502\N,0,1.7383048635,4.6593763051,6.101687646
\N,0,1.0136471133,5.4888468285,6.9083313849\C,0,7.3411390929,3.7731661
51,5.902283199\C,0,5.6152325501,1.791248602,7.078844114\C,0,6.48241300
58,4.0443756561,8.6337990899\C,0,3.2328573815,8.0121687805,8.217436823
3\C,0,4.6030455654,8.070245047,8.0003990608\C,0,4.8274994044,7.4034298
332,6.7836722266\C,0,6.1410076036,7.2007370225,6.122575632\C,0,2.42072
02215,8.5522721432,9.3379340056\C,0,-0.021747079,8.5601580803,5.178061
8153\C,0,0.1091980087,8.7842954029,3.8131347677\C,0,1.1224511747,7.914
137307,3.3737806537\C,0,1.6174135555,7.7195756616,1.9869228519\C,0,-0.
9178327085,9.2049606943,6.1713342812\C,0,0.2371389981,4.7633125727,7.7
427544929\C,0,0.4568056586,3.4188462957,7.45509184\C,0,1.4057710634,3.
3956654367,6.4273440808\C,0,1.9963185557,2.2120847463,5.7581354322\C,0
,-0.6585675969,5.368931324,8.7607691872\H,0,-0.015627469,2.5607458202,
7.9349927753\H,0,-1.2178323984,4.5793073771,9.286604019\H,0,-0.0979020
586,5.945450088,9.5174719079\H,0,-1.3912620932,6.0611929068,8.31052455
33\H,0,1.8122597052,2.2169185084,4.6692033672\H,0,1.572819545,1.284031
7844,6.1745193666\H,0,3.0895599519,2.1957010481,5.8986492373\H,0,-0.45
76995417,9.4937255923,3.2082216141\H,0,1.4333914385,8.6223349399,1.380
9118984\H,0,2.6950430456,7.4888058449,1.9704360363\H,0,1.09995055,6.87
79368138,1.4913094608\H,0,5.3508256702,8.539162645,8.6424888413\H,0,3.
073626575,9.0440609837,10.0762828031\H,0,1.6802793748,9.2970045225,8.9
944214638\H,0,1.8556097409,7.7613266191,9.8623886919\H,0,7.8276271093,
4.7465135785,6.0764919568\H,0,8.084653899,2.9772966409,6.0795493612\H,
0,7.0234794203,3.737661033,4.8464532446\H,0,6.5045937141,1.2601146668,
7.4593257674\H,0,5.3664915979,1.386015532,6.0836970082\H,0,4.766979907
8,1.5898591508,7.7547970779\H,0,7.3834933313,3.4790061077,8.9266070455
\H,0,6.716790702,5.1223078336,8.6471486158\H,0,5.6860647774,3.85565379
15,9.3731898623\H,0,0.5179602057,7.5247586378,7.7337699213\H,0,-1.5706
24436,9.9393765938,5.6738422225\H,0,-0.3497194936,9.7353068675,6.95672
02502\H,0,-1.5640541879,8.472201502,6.6865296207\H,0,6.9523678192,7.21
89561488,6.8712951079\H,0,6.3572711455,7.9944908311,5.3848995388\H,0,6
.1705184703,6.2494531794,5.5750334792\C,0,5.423437011,1.5840077941,2.9
720755165\C,0,4.7243202784,2.706982275,3.5438474778\N,0,4.1517232556,3
.5988495026,4.0201241919\H,0,5.4441344647,1.6630236358,1.8726692512\H,
0,4.9318857125,0.6347805701,3.2446849233\H,0,6.4649964927,1.5549444206
,3.3331538871\Version=ES64L-G09RevD.01\HF=-2209.8029913\RMSD=2.359e-0
9\Dipole=1.9783315,-4.1732047,3.2044765\Quadrupole=27.1841915,-78.4025
701,51.2183786,-30.9416398,39.3340387,-0.0866711\PG=C01 [X(C20H34B1Cl1
Mo1N702P1)]\@\
```

## Scheme S6

### I<sub>a</sub>-NNO (HPyr<sup>+</sup>)

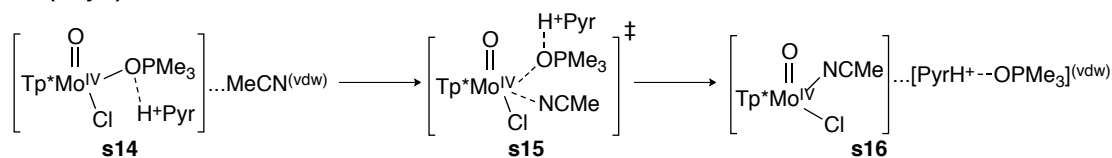

### s14

```

1\1\GINC-COMET-02-67\Stability\RM06L\Gen\C25H40B1Cl1Mo1N8O2P1(1+)\TALI
POVM\13-Aug-2017\0\#\#P M06L/chkbasis stable(opt) pop(nbo) scrf(check)
guess(read) geom(allcheck) nosym scf(fermi,xqc,maxcyc=200) int(grid=ul
trafine)\Title\1,1\Mo,0,3.4874753297,5.0514265611,5.5845282804\0,0,2
.991843041,3.6469167937,4.7648441324\0,0,4.9997466943,4.2342183452,6.9
964417297\P,0,6.2443248015,3.358869483,6.6274493262\B,0,1.2972303773,7
.2163925686,6.8589903925\Cl,0,5.4285515838,5.9043672924,4.2732015333\N
,0,3.7983174638,7.0087248626,7.0140078632\N,0,2.6826443593,7.748316934
5,7.2758676527\N,0,2.1524841652,6.4394990234,4.6002191096\N,0,1.230894
9442,7.1520698962,5.3170864866\N,0,1.9274139241,4.7863183067,7.0965090
532\N,0,1.1130829835,5.8111428316,7.4686821735\C,0,7.7690104302,4.2787
131074,6.4076206491\C,0,5.9595625112,2.4111035645,5.1322663321\C,0,6.5
397706147,2.1881176673,7.9573464228\C,0,3.0035172402,8.8906038232,7.92
68869192\C,0,4.3832088391,8.8862799147,8.1014712772\C,0,4.8434459403,7
.6963835402,7.5164964196\C,0,6.2419669467,7.2032911386,7.4706674481\C,
0,1.9975413869,9.9054352922,8.3280297796\C,0,0.4329687409,7.8493571794
,4.4773769639\C,0,0.8349236068,7.5551770306,3.1775645502\C,0,1.9171641
649,6.6756087121,3.2927933751\C,0,2.716262629,6.0625600963,2.202995020
1\C,0,-0.6491505976,8.7506996249,4.9452043898\C,0,0.2285436606,5.38629
24129,8.4034225571\C,0,0.4643314658,4.0306423823,8.6117388073\C,0,1.53
07155326,3.6889284246,7.7680941523\C,0,2.1659961099,2.364180906,7.5576
900631\C,0,-0.7604429205,6.2867341924,9.0455944557\H,0,-0.075278359,3.
3705610233,9.2922621789\H,0,-1.361097118,5.727521708,9.7797552236\H,0,
-0.2713515453,7.1241453815,9.5751010711\H,0,-1.4527750992,6.7342374543
,8.3107277584\H,0,1.7477523902,1.8541814585,6.6704848335\H,0,2.0006559
641,1.7034882837,8.4249826407\H,0,3.2497297724,2.4593341273,7.37643645
46\H,0,0.3907203812,7.9330033299,2.2560032549\H,0,2.1444325817,6.06723
04231,1.2611645269\H,0,3.653729876,6.6204535601,2.0311393408\H,0,3.002
3264239,5.0243873937,2.4371668448\H,0,4.9858469739,9.6568664741,8.5840
197736\H,0,2.4918499957,10.7509779789,8.8306052069\H,0,1.4470847513,10
.3041591945,7.4574200552\H,0,1.2438402682,9.4924579399,9.0212723142\H,
0,8.5899432669,3.5681901838,6.2105701404\H,0,7.6666913541,4.9652845729
,5.5525044854\H,0,8.0110639193,4.8531089843,7.315727629\H,0,6.82556293
69,1.7585095348,4.9294739824\H,0,5.8141706133,3.0988931453,4.283419547
5\H,0,5.0563131236,1.7896044691,5.2467794145\H,0,7.4178597211,1.563161
42,7.7243087282\H,0,6.7380734524,2.7228816075,8.9012300963\H,0,5.66871
17883,1.5248466829,8.0862546202\H,0,0.4332308803,7.9538553769,7.269821
911\H,0,-1.2056646602,9.1503853743,4.0835077757\H,0,-0.2534010974,9.60
87417901,5.5168922702\H,0,-1.3660686164,8.2301879333,5.6035640051\H,0,
6.9456679479,8.0391007464,7.6119348954\H,0,6.4604892861,6.7187280439,6
.5069142604\H,0,6.4403133644,6.4687014546,8.2737119443\C,0,4.058393277
7,9.370647267,4.5415496819\C,0,5.4276241395,9.6852064343,4.8766480781\
N,0,6.5331925069,9.9315399571,5.1451028699\H,0,3.8589834652,9.59206172
97,3.4791548828\H,0,3.3602268154,9.9639163765,5.157116857\H,0,3.867677
0778,8.2965371581,4.7135776538\H,0,2.9592443257,2.5138407149,11.829231

```

1622\C,0,3.0206070709,3.4837398668,11.3302408241\C,0,2.391443041,4.6157135491,11.8507662232\C,0,2.5009051701,5.8347780111,11.1826479673\H,0,2.0252856128,6.7411170036,11.565940197\C,0,3.2287761105,5.8981507548,10.0055152569\H,0,3.3683356908,6.8174701963,9.4318914152\N,0,3.8188646281,4.7883978726,9.5269183955\C,0,3.7333377588,3.5996813456,10.1506995426\H,0,4.2473313714,2.7638611988,9.6720057339\H,0,1.81689194,4.5472083262,12.7797376479\H,0,4.3243436922,4.8100531026,8.61193923\\Version=ES64L-G09RevD.01\HF=-2458.3641848\RMSD=1.838e-09\Dipole=-0.7772614,-3.6830202,7.1719683\Quadrupole=-122.2818146,-99.2327233,221.5145379,-4.4748972,120.1448604,158.7555745\PG=C01 [X(C25H40B1Cl1Mo1N8O2P1)]\@

### s15 (Imaginary frequency: 77.0i cm<sup>-1</sup>)

1\1\GINC-COMET-04-59\Stability\RM06L\Gen\C25H40B1Cl1Mo1N8O2P1(1+)\TALIPOVM\20-Aug-2017\0\#\#P M06L/chkbasis stable(opt) pop(nbo) scrf(check) guess(read) geom(allcheck) nosym scf(fermi,xqc,maxcyc=200) int(grid=ultrafine)\Title\1,1\Mo,0,3.2261540761,5.8242894285,6.4914493915\0,0,2.9914714165,4.3475561108,5.6931504617\0,0,4.7694914579,4.3918476871,7.8300146984\P,0,5.8465760814,3.4688593026,7.1979787832\B,0,0.5417315682,7.8696266113,6.5026661197\Cl,0,5.4321447425,6.6006272222,5.6269593647\N,0,2.9613415346,8.2174185645,7.0685480441\N,0,1.6930581858,8.7065544901,7.0803130054\N,0,2.0437247334,6.6986109167,4.8602832911\N,0,0.9230297874,7.4372629019,5.0772229829\N,0,1.31773188,5.7094530645,7.5700369782\N,0,0.3195855633,6.6167259725,7.3807447505\C,0,7.4949376794,4.1825159678,7.3055173722\C,0,5.5815209556,3.0337501733,5.4759658133\C,0,5.8994399897,1.9108738834,8.1037299221\C,0,1.6524665469,9.9355995518,7.6461657676\C,0,2.9529195102,10.2520695795,8.0183693163\C,0,3.7409349703,9.1524431642,7.6403105221\C,0,5.2051062961,9.009264478,7.8534571564\C,0,0.4018056666,10.7230035441,7.7922747174\C,0,0.3279651532,7.7414414562,3.9000036\C,0,1.0847349828,7.155398035,2.8919509742\C,0,2.1522162895,6.5073263481,3.532786411\C,0,3.2264275172,5.6864394762,2.919519927\C,0,-0.9006396341,8.5699691116,3.8084718491\C,0,-0.7721959778,6.2614098395,8.096993004\C,0,-0.469602622,5.075520234,8.7591469861\C,0,0.8496634981,4.7631628003,8.4045951771\C,0,1.665509849,3.5899839862,8.8014228616\C,0,-2.0264178406,7.055766331,8.1146181293\H,0,-1.1301643581,4.5073010693,9.4152817693\H,0,-2.7820046445,6.553441998,8.7385505343\H,0,-1.8716726716,8.0693991124,8.524003178\H,0,-2.4508829085,7.1814614026,7.1030650791\H,0,1.4184540495,2.7022471804,8.1890481984\H,0,1.4754092415,3.31492528,9.8537907677\H,0,2.740621193,3.7862243315,8.6538966674\H,0,0.8894703444,7.1950305391,1.8194534878\H,0,3.3243663227,5.9210357094,1.8469106673\H,0,4.1973011787,5.8553071305,3.4139184209\H,0,3.0065585609,4.6065049659,3.0061694627\H,0,3.2921563286,11.1696988315,8.5018935146\H,0,0.6171133134,11.6904865887,8.2724699996\H,0,-0.0759150578,10.9288407281,6.8178736961\H,0,-0.349626456,10.20127083,8.4112787491\H,0,8.2472423595,3.4876649321,6.895600082\H,0,7.5099537411,5.1241111611,6.7332576773\H,0,7.7509622951,4.3976710483,8.3560481117\H,0,6.4204039405,2.3997991197,5.1413240029\H,0,5.5406043307,3.9464055604,4.8608556948\H,0,4.6367548738,2.4815618815,5.3608342159\H,0,6.6145650146,1.2099232733,7.6413275651\H,0,6.2100690823,2.077500052,9.1486610427\H,0,4.8969332387,1.4498040485,8.1010537131\H,0,-0.4760742671,8.5217314512,6.4778770404\H,0,-1.2110634156,8.6716257617,2.7568358609\H,0,-0.7463390991,9.5854904582,4.2150388013\H,0,-1.7427308142,8.1269077599,4.3692533172\H,0,5.5488859226,9.7535090012,8.5912907225\H,0,5.7774335072,9.1705009177,6.9236526325\H,0,5.4734648756,8.0041698133,8.217097657\C,0,1.971091848,7.0459234287,11.1624312538\C,0,2.8666941371,6.7768789788,10.0649980132\N,0,3.5732425531,6.5377980521,9.1726025894\H,0,2.471677372,7.6503837153,11.9369059148\H,0,1.6316711905,6.1000598295,11.6183015165\H,0,1.0854188311,7.5987026717,10.8052708907\H,0,4.1259082068,2.9039496057,13.33429



29167\C,0,4.6233162703,3.6418293658,12.70044473\C,0,5.4218246668,4.649411009,13.2428236147\C,0,6.0442821989,5.5716034343,12.3995968261\H,0,6.6765777587,6.3700174537,12.7950559217\C,0,5.8442853374,5.4688195277,11.0335148106\H,0,6.2736528061,6.1575473102,10.3008548955\N,0,5.0681686438,4.488979878,10.5410991289\C,0,4.4625655131,3.5833852632,11.3256891984\H,0,3.8553897536,2.8278440155,10.8202355205\H,0,5.560209164,4.7161018594,14.3265087456\H,0,4.9020918697,4.4689914313,9.4883458056\\Version=ES64L-G09RevD.01\HF=-2458.3279636\RMSD=2.170e-09\Dipole=2.3445137,-3.8243628,8.8524023\Quadrupole=-133.8875879,-154.9792542,288.8668421,39.8539473,190.1894781,200.1483896\PG=C01 [X(C25H40B1Cl1Mo1N8O2P1)]\@

## s16

1\1\GINC-COMET-10-01\Stability\RM06L\Gen\C25H40B1Cl1Mo1N8O2P1(1+)\TALIPOVM\29-Jul-2017\0\#P M06L/chkbasis stable(opt) pop(nbo) scrf(check) guess(read) geom(allcheck) nosym scf(fermi,xqc,maxcyc=200) int(grid=ultrafine)\Title\1,1\Mo,0,4.9571590049,4.5355601631,3.5747236869\0,0,3.3095272143,4.1066037116,3.6120503397\0,0,1.9407215336,6.137117786,0.3834448061\P,0,0.9485839465,6.3721750041,1.529497381\B,0,7.4479603487,2.3286157017,3.81706619\Cl,0,5.1044182531,6.5800756059,4.9973469576\N,0,7.3351048919,4.7862390538,3.2919857145\N,0,8.1059462325,3.683098385,3.5026446063\N,0,5.6081560801,3.3108736702,5.2507799836\N,0,6.6388963599,2.4267907149,5.1298030366\N,0,5.475482935,2.8091383544,2.3217674871\N,0,6.4904282173,1.9683998553,2.6591570244\C,0,-0.5029055912,7.2859727323,0.9746006467\C,0,1.6951275113,7.3285576883,2.8570007006\C,0,0.3517948329,4.8434994275,2.2682573446\C,0,9.4170757738,3.9792978359,3.3446445781\C,0,9.4953720743,5.3271558089,3.0166516811\C,0,8.1725182616,5.7958505276,2.9896864269\C,0,7.7199652059,7.1709718917,2.6527875512\C,0,10.5023608117,2.9805289445,3.5151554619\C,0,6.7769424753,1.7195399755,6.2739539812\C,0,5.7872242606,2.1499727271,7.1530328141\C,0,5.0730626128,3.1472904141,6.4775727077\C,0,3.8672588532,3.8862575018,6.9263294758\C,0,7.82737178,0.6890944351,6.4686520941\C,0,6.5177278841,0.910947699,1.8142476195\C,0,5.4679564407,1.070304909,0.9161603346\C,0,4.8367207341,2.2731531935,1.2657786717\C,0,3.6244539805,2.8846145545,0.6662040347\C,0,7.5329920709,-0.1680633977,1.9048411757\H,0,5.1940419503,0.3959518476,0.1038115641\H,0,8.5581114761,0.2141133892,1.7538123271\H,0,7.5199040349,-0.6674298596,2.8895766069\H,0,7.3421568444,-0.9324009681,1.1356682648\H,0,3.4731019014,2.5019736869,-0.3571818521\H,0,3.6805055534,3.9861253778,0.6354219733\H,0,2.7172126285,2.6343954175,1.2480172287\H,0,5.605063178,1.7810999438,8.1630837384\H,0,2.9562252283,3.4940962501,6.4374498182\H,0,3.7318104144,3.7807649528,8.0145030374\H,0,3.9319975646,4.9572968661,6.6738095616\H,0,10.4020630009,5.9021849098,2.8231061615\H,0,11.4823164143,3.4556207575,3.3526115144\H,0,10.5049273305,2.5391168964,4.5271803718\H,0,10.4110549336,2.1427024012,2.8016172053\H,0,-1.2147233825,7.4605454179,1.7984389306\H,0,-0.1890312632,8.2585339401,0.5606427324\H,0,-1.0131897087,6.718410847,0.1779837998\H,0,0.9565726724,7.5440838427,3.6475185253\H,0,2.0748143428,8.2847583223,2.4581668486\H,0,2.5369039536,6.7687482199,3.2996136016\H,0,-0.3730061234,5.0521602323,3.0733922417\H,0,-0.1402516768,4.2192834332,1.5037234219\H,0,1.2081375577,4.2916005802,2.6918304463\H,0,8.2925588214,1.4718998494,3.9278270303\H,0,7.7419561727,0.2487892169,7.474144093\H,0,8.8433472199,1.1094338188,6.3688013422\H,0,7.7458388437,-0.1296319546,5.7322460871\H,0,7.5300908994,7.2781878432,1.568104908\H,0,8.5022674255,7.9042911511,2.9096687613\H,0,6.7955782715,7.442165706,3.1868133595\C,0,4.6773257223,7.6838213368,0.0499366917\C,0,4.7746472735,6.6897205725,1.0825293885\N,0,4.8593966633,5.90043781,1.9325943861\H,0,3.6309923411,7.7113958229,-0.2977812361\H,0,5.3357081925,7.439151152,-0.8003789787\H,0,4.954440296,8.6778529162,0.4404916068\H,0,-0.0602024511,2.3182492084,-3.291

0258128\C,0,0.7948209735,2.9680619655,-3.0894435736\C,0,1.9237215038,2  
.9613056982,-3.9095084468\C,0,2.9955760372,3.8069204841,-3.6202069413\  
H,0,3.8925887853,3.824490312,-4.2438638737\C,0,2.9113289024,4.63575613  
51,-2.5133179215\H,0,3.7068433159,5.3210363914,-2.2085256508\N,0,1.813  
552649,4.6208801323,-1.7417099637\C,0,0.767618579,3.8208422514,-1.9977  
052769\H,0,-0.0768780685,3.8887739888,-1.3068504006\H,0,1.9686237562,2  
.294720528,-4.7765520553\H,0,1.7932840587,5.2542480844,-0.8659711065\  
Version=ES64L-G09RevD.01\HF=-2458.3520569\RMSD=1.997e-09\Dipole=-5.522  
0183,-0.0120263,-9.3411398\Quadrupole=1.7102209,39.9539709,-41.6641918  
,10.110565,-29.1692644,-52.7416439\PG=C01 [X(C25H40B1Cl1Mo1N8O2P1)]\ \@

## Scheme S7

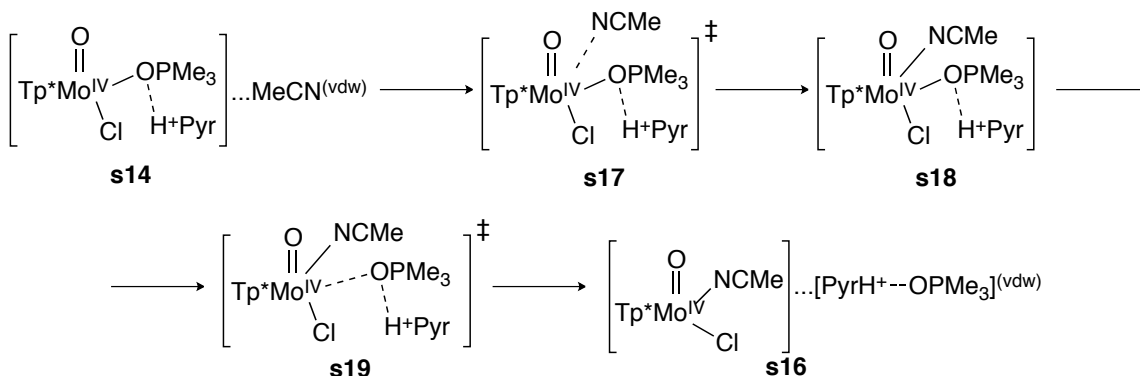

### s17 (Imaginary frequency: 67.0 *i* cm<sup>-1</sup>)

```

1\1\GINC-COMET-05-15\Stability\RM06L\Gen\C25H40B1Cl1Mo1N8O2P1(1+)\TALI
POVM\09-Aug-2017\0\#\#P M06L/chkbasis stable(opt) pop(nbo) scrf(check)
guess(read) geom(allcheck) nosym scf(fermi,xqc,maxcyc=200) int(grid=ul
trafine)\Title\1,1\Mo,0,3.2112013326,5.2904458697,5.0896629534\0,0,2
.3072717635,4.7340513941,3.7674157886\0,0,4.7359726345,4.398474628,6.7
116000041\P,0,6.0712975253,3.6142551172,6.7955108818\B,0,1.2265158541,
7.078863071,7.2110784964\Cl,0,5.2188483236,6.2496484825,3.9573082214\N
,0,3.7180452355,6.9994406294,6.9335231769\N,0,2.6465977899,7.522575550
3,7.5900145664\N,0,1.9008670108,7.0881239555,4.7950445954\N,0,1.009069
6898,7.4828889232,5.7433346054\N,0,1.790654764,4.6655164887,6.62740181
54\N,0,1.0619806304,5.5496549208,7.3727106555\C,0,7.2222525701,3.91598
92706,5.4501142351\C,0,5.8452123531,1.8295961732,6.9087499644\C,0,6.93
4722338,4.0726795473,8.3107018173\C,0,3.0146282729,8.5600364381,8.3820
706881\C,0,4.3879290365,8.7034229357,8.244831014\C,0,4.7887935386,7.71
05719468,7.3302579117\C,0,6.1755540279,7.4673718114,6.8598757052\C,0,2
.0576746279,9.3177032742,9.2276214609\C,0,0.119249644,8.3591976356,5.2
187149076\C,0,0.4416510665,8.5170660187,3.8771026932\C,0,1.5607607296,
7.6999420399,3.6473441672\C,0,2.2554689989,7.4612941205,2.3579075628\C
,0,-0.9622647794,8.9918272515,6.0155297094\C,0,0.1587821077,4.88461484
29,8.1272969003\C,0,0.2918254551,3.5275111352,7.8416738985\C,0,1.32343
90606,3.4313447425,6.9011585915\C,0,1.8911458946,2.2143069946,6.272959
3272\C,0,-0.7613102211,5.5550511616,9.0798195975\H,0,-0.2803453639,2.7
082596451,8.2791009149\H,0,-1.3348896969,4.8020970995,9.6428836506\H,0
,-0.2169798374,6.1839783755,9.8060145926\H,0,-1.4832491445,6.213461356
1,8.5652613711\H,0,1.6538565509,2.16042128,5.1951132447\H,0,1.49319803
85,1.306910739,6.7552695312\H,0,2.9918376629,2.2069311921,6.3464450355
\H,0,-0.0709273099,9.1485492028,3.1499788062\H,0,2.126082177,8.3254184
915,1.6851774452\H,0,3.3311023091,7.2739221254,2.5041624116\H,0,1.8419
862482,6.5753764755,1.8423526719\H,0,5.0269482292,9.427475385,8.752693
4464\H,0,2.5989945941,10.0410412099,9.8574706718\H,0,1.325955513,9.882
6953226,8.6234302219\H,0,1.4767721901,8.6538547129,9.8925366783\H,0,8.
1165894051,3.2876995306,5.6010745763\H,0,6.761817416,3.6791954156,4.48
00071561\H,0,7.5225083752,4.9749075455,5.4319761931\H,0,6.8236355931,1
.3413972865,7.0579364243\H,0,5.3846760874,1.4269491885,5.9943398882\H,
0,5.2012877476,1.5815335929,7.7685826975\H,0,7.917335158,3.5743880748,
8.3618089658\H,0,7.0899779717,5.1635077212,8.3452244599\H,0,6.35061272
52,3.7711300681,9.1957032945\H,0,0.4157592087,7.6363437694,7.913322513
9\H,0,-1.6086517128,9.5965327993,5.3603406394\H,0,-0.5667172679,9.6587
699998,6.801958054\H,0,-1.5976670889,8.2435095021,6.5208299215\H,0,6.8

```

993088566, 7.6672694407, 7.6689301524\H, 0, 6.4380430956, 8.127714039, 6.0143907683\H, 0, 6.3006798865, 6.4396733063, 6.4987078744\C, 0, 4.8753309737, 1.2485571734, 2.5494936527\C, 0, 4.5226867802, 2.2591696301, 3.5153258795\N, 0, 4.2464267465, 3.0734166064, 4.2970302205\H, 0, 4.3305817029, 1.4160500323, 1.6064350265\H, 0, 4.6206887763, 0.2453290261, 2.9275926356\H, 0, 5.9564865624, 1.2807808564, 2.3382969042\H, 0, 1.7761390942, 2.6611368813, 11.2446674858\C, 0, 2.2939789826, 3.5550915683, 10.8885868293\C, 0, 2.3614432967, 4.715552567, 11.658474729\C, 0, 3.0492172403, 5.8294766154, 11.1724685648\H, 0, 3.1355000961, 6.7485274384, 11.7580943185\C, 0, 3.6392179624, 5.7619235739, 9.9222270592\H, 0, 4.2193343894, 6.5778909059, 9.4802737308\N, 0, 3.5352962968, 4.6370559239, 9.191985076\C, 0, 2.8974392315, 3.5429073514, 9.6412499755\H, 0, 2.8983819628, 2.6731125989, 8.9811429982\H, 0, 1.8861561895, 4.7492870273, 12.6439853079\H, 0, 3.9672078231, 4.6125682698, 8.2261894195\\Version=ES64L-G09RevD.01\HF=-2458.3387644\RMSD=2.112e-09\Dipole=1.946387, -5.413774, 6.6446927\Quadrupole=-76.8808242, -125.4392627, 202.3200868, 23.8099577, 130.5085445, 144.9875443\PG=C01 [X(C25H40B1Cl1Mo1N8O2P1)]\@

### s18

I\I\GINC-COMET-05-14\Stability\RM06L\Gen\C25H40B1Cl1Mo1N8O2P1(1+)\TALIPOVM\09-Aug-2017\0\#\#P M06L/chkbasis stable(opt) pop(nbo) scrf(check) guess(read) geom(allcheck) nosym scf(fermi,xqc,maxcyc=200) int(grid=ultrafine)\Title\1,1\N,0,3.4783333628,4.3832918033,8.9803908764\H,0,3.9430321915,4.3913964352,8.0254614681\C,0,2.8139356192,3.2833210061,9.3723995829\H,0,2.8164244681,2.4381660155,8.6808972555\C,0,3.5819321156,5.4768109072,9.7563230026\C,0,2.1830952318,3.2565841697,10.6060903967\H,0,4.1814278515,6.3010707804,9.3568080007\C,0,2.9680004862,5.5048777356,10.9967152914\C,0,2.2533805089,4.3836969163,11.423835639\H,0,1.6430614778,2.3582376116,10.9152045942\H,0,3.0563934136,6.3980823367,11.6207732759\H,0,1.7588831827,4.3854867548,12.4004666082\Mo,0,3.1566094661,5.2544455479,4.847775584\O,0,2.2100692125,4.867017911,3.4937212406\O,0,4.7598254908,4.2867592702,6.5646575912\O,0,6.1041075022,3.5231145655,6.61384274\O,0,1.1808810734,6.9129592723,7.0952904474\Cl,0,5.1656118966,6.274892265,3.789985392\N,0,3.673911637,6.8468150809,6.7943502128\N,0,2.6055110881,7.3289506954,7.4868526864\N,0,1.8465769839,7.1231756415,4.6988108385\N,0,0.9461739309,7.4292239664,5.6682282942\N,0,1.7499796453,4.5286846217,6.3641555386\N,0,1.0179099878,5.3747596162,7.1533250676\C,0,7.2154866252,3.8751735866,5.2446767943\C,0,5.8964849685,1.7332821722,6.6866835245\C,0,7.008027292,3.9439569225,8.1160782942\C,0,2.9749325179,8.3251934611,8.3298648393\C,0,4.3462866269,8.4808657451,8.1913748154\C,0,4.7446251163,7.5406119086,7.22199353\C,0,6.1308721876,7.3394675809,6.7310913095\C,0,2.0217651456,9.0384089356,9.2174875942\C,0,0.0457600055,8.3334541292,5.2126356388\C,0,0.3737631709,8.6043848603,3.8904684515\C,0,1.5051250438,7.8213047028,3.6036138813\C,0,2.213781689,7.6976582687,2.30488461\C,0,-1.0493858399,8.8823507481,6.0519494367\C,0,0.1164070847,4.6725708285,7.8746221937\C,0,0.253306138,3.3313234599,7.525575201\C,0,1.2844473491,3.2813821167,6.5827567277\C,0,1.8441883603,2.0807625047,5.9160700423\C,0,-0.8098871304,5.2875944219,8.858313861\H,0,-0.316186932,2.4903211729,7.9233635621\H,0,-1.3806643449,4.5016238213,9.377505164\H,0,-0.2729786521,5.8798540494,9.6198497382\H,0,-1.5343866284,5.9680354932,8.377521813\H,0,1.6992236373,2.1113091271,4.8219145211\H,0,1.3568190892,1.1702492599,6.2998075372\H,0,2.930946704,1.9958210031,6.0877714397\H,0,-0.1425211675,9.2874601807,3.2142450515\H,0,2.092225864,8.6179590034,1.7094872194\H,0,3.2881422128,7.4978994085,2.4447054391\H,0,1.8061037088,6.8618955109,1.7072961197\H,0,4.9865251812,9.1796444215,8.732117999\H,0,2.5669448022,9.7260374985,9.8831105711\H,0,1.2904658954,9.6371815117,8.6459740095\H,0,1.439646452,8.3429716741,9.8480384065\H,0,7.5390839145,4.9272594542,5.2767239076\H,0,8.10297020

85, 3.2243625155, 5.3212720789\H, 0, 6.7176387701, 3.7128967345, 4.277404164  
3\H, 0, 6.8790366163, 1.2393545769, 6.775753956\H, 0, 5.3884859671, 1.3488161  
649, 5.7892577266\H, 0, 5.2924409962, 1.4658816552, 7.5696859026\H, 0, 8.0011  
074014, 3.4638598733, 8.1186176029\H, 0, 7.1419177966, 5.0359592767, 8.18571  
49157\H, 0, 6.4560101281, 3.5972650933, 9.0053287452\H, 0, 0.3797679321, 7.41  
56856557, 7.8481260665\H, 0, -1.7000615365, 9.532041095, 5.4458370601\H, 0, -  
0.6688599083, 9.4853033906, 6.8954073678\H, 0, -1.6783115554, 8.0859319269,  
6.4868331609\H, 0, 6.8571609755, 7.5291002373, 7.5403291895\H, 0, 6.37180714  
98, 8.0307155061, 5.9042132751\H, 0, 6.2737717364, 6.3266787059, 6.337289144  
8\C, 0, 4.979735589, 1.2570511485, 2.7687240397\C, 0, 4.4783881014, 2.3727708  
078, 3.5301486128\N, 0, 4.0845915577, 3.2638914845, 4.1632026452\H, 0, 6.0492  
638807, 1.0958442026, 2.9846164362\H, 0, 4.8703240877, 1.4502612004, 1.68916  
45625\H, 0, 4.4280392495, 0.3350643414, 3.016631422\\Version=ES64L-G09RevD  
.01\HF=-2458.3395892\RMSD=2.888e-09\Dipole=2.1385974, -6.0064892, 6.6366  
878\Quadrupole=-64.8010885, -130.3395801, 195.1406685, 20.3892075, 127.561  
3134, 131.1135041\PG=C01 [X(C25H40B1Cl1Mo1N8O2P1)]\@\@

### **s19 (Imaginary frequency: 25.1*i* cm<sup>-1</sup>)**

1\1\GINC-COMET-08-12\Stability\RM06L\Gen\C25H40B1Cl1Mo1N8O2P1(1+)\TALI  
POVM\10-Aug-2017\0\#\#P M06L/chkbasis stable(opt) pop(nbo) scrf(check)  
guess(read) geom(allcheck) nosym scf(fermi,xqc,maxcyc=200) int(grid=ul  
trafine)\Title\1,1\N,0,3.4482420241,4.2857669329,9.0035900462\H,0,3.  
9549158846,4.2328723746,8.0612810964\C,0,2.7534239249,3.2263650118,9.4  
470323602\H,0,2.7498331127,2.3426509007,8.8047049966\C,0,3.5604269186,  
5.4215620832,9.7124865925\C,0,2.1013930128,3.2860157931,10.6692082976\  
H,0,4.182167016,6.2072592908,9.2699441225\C,0,2.9285314165,5.538030428  
,10.939072068\C,0,2.1849410656,4.4580938916,11.4199768477\H,0,1.536553  
6053,2.4197297163,11.0227030232\H,0,3.0264425433,6.4643259541,11.51139  
73671\H,0,1.6771000929,4.5276165453,12.3873601117\Mo,0,3.0388868332,5.  
3215625629,4.719101993\O,0,2.0601901071,4.8727109419,3.4096230324\O,0,  
4.8265004513,4.1828914247,6.7208390017\P,0,6.1662819132,3.4252399123,6  
.7474978556\B,0,1.1633944559,6.93609532,7.0555434415\Cl,0,5.0090083611  
,6.3761608535,3.6426192939\N,0,3.6486605815,6.8186456901,6.6703442765\  
N,0,2.6099181921,7.3279329372,7.3894295021\N,0,1.7109001331,7.15944253  
98,4.6329639004\N,0,0.864663046,7.4731440891,5.6476608757\N,0,1.733944  
9484,4.5655459632,6.299197216\N,0,1.0001025345,5.39778173,7.0998180703  
\C,0,7.2543838121,3.8623746464,5.3734571611\C,0,5.9463792087,1.6345274  
36,6.7386779417\C,0,7.0910069151,3.7806978954,8.2539734121\C,0,3.03204  
20196,8.2913223057,8.2448785327\C,0,4.4070542291,8.3932148383,8.089890  
303\C,0,4.7535052491,7.4571304367,7.0977708298\C,0,6.1244633073,7.1948  
674763,6.5932156878\C,0,2.1206123728,9.0321465603,9.1536704506\C,0,-0.  
0412473295,8.3944758062,5.2421152413\C,0,0.2250085468,8.6683624875,3.9  
061103373\C,0,1.3277923423,7.8702394352,3.5592266355\C,0,1.9733490013,  
7.7412399585,2.2285335977\C,0,-1.0837661964,8.956259873,6.1378367184\C  
,0,0.1328475043,4.6783290038,7.845034875\C,0,0.2966792833,3.3384542514  
,7.5013836284\C,0,1.3090765036,3.3071131341,6.5378961164\C,0,1.8906765  
809,2.1159131105,5.8726338377\C,0,-0.7883511224,5.2771122744,8.8432244  
449\H,0,-0.2420868336,2.4861145259,7.9175498642\H,0,-1.336630535,4.481  
4343007,9.3718162893\H,0,-0.2505944974,5.8793689298,9.5960548269\H,0,-  
1.5322686041,5.9443495612,8.3737034022\H,0,1.7503598518,2.1419938221,4  
.7777343053\H,0,1.4173968354,1.1976406422,6.2555084919\H,0,2.977595012  
1,2.0520858367,6.0533380283\H,0,-0.3136489946,9.3632403383,3.260181002  
4\H,0,1.8105596679,8.6529316176,1.630268916\H,0,3.0563533096,7.5584761  
362,2.3172108385\H,0,1.5496553243,6.893094684,1.6602335495\H,0,5.08234  
13157,9.0546740311,8.6349548393\H,0,2.7023453424,9.6862117628,9.822196  
7712\H,0,1.4108195996,9.6705135622,8.5978085804\H,0,1.5132419003,8.355  
8913525,9.7810287546\H,0,7.8807478269,4.7275452918,5.6461813326\H,0,7.

9229443244, 3.0218256585, 5.1208922744\H, 0, 6.6571879642, 4.1452549219, 4.4  
909878065\H, 0, 6.9187295852, 1.1177261009, 6.80429586\H, 0, 5.4282160274, 1.  
2983699204, 5.8266941982\H, 0, 5.3329293943, 1.3422468457, 7.6081029502\H, 0  
, 8.0821958288, 3.2967503501, 8.2319635961\H, 0, 7.2302895144, 4.870737463, 8  
.3499022985\H, 0, 6.5420715566, 3.4160867953, 9.1384610676\H, 0, 0.401185321  
, 7.4330467122, 7.851522618\H, 0, -1.7484070486, 9.6262798922, 5.5703626117\  
H, 0, -0.6504222283, 9.5407918671, 6.9685707462\H, 0, -1.7080186082, 8.167832  
118, 6.5933209045\H, 0, 6.8588194971, 7.2890457878, 7.4124055379\H, 0, 6.4146  
993437, 7.918129058, 5.8107749724\H, 0, 6.1992666983, 6.1975197296, 6.144897  
9618\C, 0, 5.2037656065, 1.4594557302, 2.8932314888\C, 0, 4.5895590492, 2.555  
6367593, 3.5975013535\N, 0, 4.0961125486, 3.4348316247, 4.1751525759\H, 0, 6.  
2867663901, 1.4285980239, 3.0995515203\H, 0, 5.0650373422, 1.5819572585, 1.8  
064617189\H, 0, 4.7586209695, 0.4969111706, 3.1957390059\\Version=ES64L-G0  
9RevD.01\HF=-2458.3389399\RMSD=4.311e-09\Dipole=2.2399046, -5.8811809, 6  
.617831\Quadrupole=-62.8828614, -129.0007233, 191.8835847, 20.4654643, 127  
.0491084, 130.8600003\PG=C01 [X(C25H40B1Cl1Mo1N8O2P1)]\@

## Alternative/non-competitive pathways

### Scheme S8

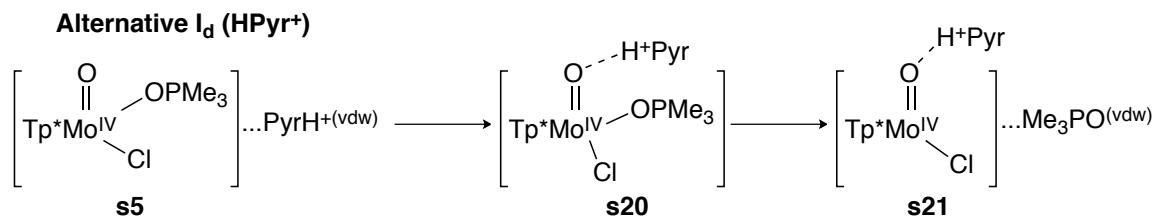

### s20

```
1\1\GINC-COMET-04-17\Stability\RM06L\Gen\C23H37B1Cl11Mo1N7O2P1(1+)\TALI
POVM\01-Aug-2017\0\#\P M06L/chkbasis stable(opt) pop(nbo) scrf(check)
guess(read) geom(allcheck) nosym scf(fermi,xqc,maxcyc=200) int(grid=ul
trafine)\Title\1,1Mo,0,4.1377592072,4.1255636854,4.1426994885\0,0,2
.9255610212,3.2534097623,5.0105969422\0,0,3.1187077503,4.4708334688,2.
2691218401\P,0,1.7643461822,5.1745968081,1.9779506078\B,0,7.1877019895
,2.8042263995,4.2795846623\Cl,0,3.7701565274,6.5431743657,4.5694835915
\N,0,6.1557498356,4.7546417418,3.0768272128\N,0,7.2702380215,4.0191659
981,3.3442135292\N,0,5.5292583628,3.9182416468,5.8195027962\N,0,6.7186
126791,3.2656556173,5.6744453508\N,0,4.9136251674,2.2286968069,3.35147
8091\N,0,6.1633573921,1.803921822,3.6898617388\C,0,1.9438968475,6.8792
549272,1.4381067259\C,0,0.6616116643,5.1584037752,3.3949737115\C,0,0.9
39146767,4.2895024023,0.6507757083\C,0,8.3347147853,4.5024404322,2.663
6142462\C,0,7.8888047249,5.592611572,1.9252585283\C,0,6.5209474937,5.7
17748338,2.2100192378\C,0,5.5726981587,6.7244996587,1.6729588338\C,0,9
.6899652386,3.9028338515,2.7511092487\C,0,7.3104635477,3.0980898139,6.
8790945967\C,0,6.4606328899,3.6434174897,7.8377523024\C,0,5.3565338986
,4.149981201,7.1369462379\C,0,4.1193478129,4.7607516174,7.6813602995\C
,0,8.6273339024,2.4342532517,7.0453246985\C,0,6.3378420406,0.518032226
6,3.3073177553\C,0,5.1516114898,0.0978945754,2.7116353298\C,0,4.288297
1159,1.2020048783,2.7452969214\C,0,2.8990309859,1.2973988336,2.2276371
321\C,0,7.605983085,-0.2231509511,3.5187259541\H,0,4.9426775144,-0.888
6597609,2.2954012404\H,0,7.4850203478,-1.2750019795,3.2158966319\H,0,8
.4353261308,0.2050953298,2.9277403748\H,0,7.9263649415,-0.2066493049,4
.5752694257\H,0,2.4796858999,0.2921187349,2.0589694222\H,0,2.868969794
9,1.8357090149,1.2638488142\H,0,2.2352664431,1.8456395069,2.9184584828
\H,0,6.6261268128,3.6748751791,8.9152135196\H,0,4.3027481959,5.1883530
462,8.6801596625\H,0,3.7303138399,5.5488235631,7.0166976679\H,0,3.3199
531605,4.0036003343,7.7883322337\H,0,8.4819336059,6.2175431669,1.25623
60961\H,0,10.3969059738,4.4698201154,2.1257932926\H,0,10.0762145154,3.
9040002702,3.7856575955\H,0,9.7005105311,2.8532067317,2.407388402\H,0,
0.951262991,7.3183345807,1.2394564375\H,0,2.4506891259,7.4590624944,2.
2263289569\H,0,2.5401007458,6.9237372965,0.5120783133\H,0,-0.314621434
4,5.5973232467,3.1278583982\H,0,1.1121955328,5.7374986486,4.2174500548
\H,0,0.5104826375,4.119220813,3.7310046988\H,0,0.010435293,4.805000692
3,0.3554368726\H,0,1.6081603705,4.2287435909,-0.2232488181\H,0,0.69060
31318,3.266827331,0.977828345\H,0,8.2667384283,2.2685208575,4.37235885
06\H,0,8.9066936691,2.4073996851,8.1098126308\H,0,9.4269593483,2.96257
3394,6.4969746744\H,0,8.6157444427,1.3953751045,6.6703363164\H,0,5.923
4665488,7.1029729878,0.6987588781\H,0,5.4674354409,7.5912902289,2.3495
482813\H,0,4.5707525286,6.2899065988,1.5472844794\N,0,3.4899493066,0.6
782322279,5.7499347327\H,0,3.0807453958,1.623799082,5.543609924\C,0,2.
```

8547158605, -0.4327650284, 5.3389892424\H, 0, 1.8898087479, -0.288139057, 4.8472718021\C, 0, 4.6839172891, 0.6467567422, 6.3656276546\C, 0, 3.4342561244, -1.6722930496, 5.5480460535\H, 0, 5.0983776057, 1.6123485092, 6.669105247\C, 0, 5.3085535961, -0.5675616171, 6.5963633629\C, 0, 4.6784546039, -1.7398587427, 6.1779080237\H, 0, 2.9140485873, -2.5733026762, 5.2145471855\H, 0, 6.2781345806, -0.5866941818, 7.101423745\H, 0, 5.1558152091, -2.7103397234, 6.3465294751\\Version=ES64L-G09RevD.01\HF=-2325.7148084\RMSD=2.033e-09\Dipole=-2.4902834, -5.8458434, 0.0542996\Quadrupole=23.7188806, -50.0267294, 26.3078488, -17.4526267, 71.2703384, -27.2605289\PG=C01 [X(C23H37B1Cl1Mo1N7O2P1)]\@

## s21

1\1\GINC-COMET-03-43\Stability\UM06L\Gen\C23H37B1Cl1Mo1N7O2P1(1+)\TALIPOVM\05-Aug-2017\0\#\#P M06L/chkbas stable(opt) pop(nbo) scrf(check) guess(read) geom(allcheck) nosym scf(fermi,xqc,maxcyc=200) int(grid=ultrafine)\Title\1,1\Mo,0,4.6244129361,4.1280037949,3.6541587891\0,0,3.2052409863,3.2984642036,4.1899671695\0,0,-1.2212809126,5.8213748672,1.9048440871\B,0,0.0673447273,5.1815064205,2.3649668265\B,0,7.5083050088,2.6861030653,4.4131284183\Cl,0,4.4043161359,6.5545342203,3.7996758372\N,0,6.7882449445,4.5242455733,2.8662595656\N,0,7.8114129351,3.805594032,3.4036414646\N,0,5.6129440542,3.9624565329,5.5060116953\N,0,6.7929340388,3.2862824852,5.6466142957\N,0,5.4278229871,2.1397148793,3.1314015781\N,0,6.5594143497,1.676592895,3.7258320928\C,0,-0.0365232265,3.384355275,2.5636951154\C,0,0.6440767349,5.7886691375,3.9692454189\C,0,1.4368912988,5.4442667049,1.2065453342\C,0,8.9857907473,4.1589256966,2.8315039876\C,0,8.7049870649,5.1402861621,1.8864546105\C,0,7.3174010984,5.3384423362,1.9349698542\C,0,6.4995273284,6.2735217881,1.1201831572\C,0,10.2825001586,3.5438996218,3.2088530544\C,0,7.1461842357,3.2516127839,6.9484007446\C,0,6.1467245668,3.9017430028,7.6741424278\C,0,5.2033124722,4.3385369786,6.7411884628\C,0,3.9073469712,5.0186876883,6.971972396\C,0,8.3964551483,2.6133607941,7.4268695382\C,0,6.7360480519,0.3665566766,3.4310922097\C,0,5.669398775,-0.0240885203,2.6260292277\C,0,4.8781634913,1.1209454837,2.4474056234\C,0,3.6199676321,1.2758141806,1.6733409877\C,0,7.9035718023,-0.4136923631,3.9099508161\H,0,5.4987679073,-1.0153001114,2.2039323662\H,0,7.7779342861,-1.4785469189,3.6595803592\H,0,8.8451653831,-0.0681345118,3.446558869\H,0,8.037139002,-0.331627906,5.0026950005\H,0,3.5475083753,0.5028037993,0.8918430654\H,0,3.5594312124,2.2648492379,1.186362028\H,0,2.7191063544,1.1807579793,2.3066608221\H,0,6.1140849649,4.0449227673,8.75431901\H,0,3.8383611216,5.3739073989,8.0117054831\H,0,3.771831328,5.8753093207,6.2902917381\H,0,3.0607460726,4.3296493927,6.7928345151\H,0,9.4206080083,5.6458194122,1.2369006256\H,0,11.1040238307,4.0150278361,2.6477115551\H,0,10.4956429907,3.6601139554,4.2859254298\H,0,10.3032945018,2.4609002348,2.9931271439\H,0,0.9063290315,2.9702782427,2.9597878567\H,0,-0.8554657243,3.1409323686,3.2620094211\H,0,-0.2615481724,2.9120555069,1.5921172864\H,0,1.5589017705,5.2698775632,4.3024920988\H,0,-0.1525626231,5.6306813671,4.716688618\H,0,0.8488422406,6.8709298939,3.9067157247\H,0,2.3484419793,4.8888437977,1.4851288751\H,0,1.1178436278,5.1135855167,0.2031212673\H,0,1.6798367324,6.519142626,1.1528817293\H,0,8.5242033074,2.1349406921,4.7624101896\H,0,8.4808897472,2.7171601627,8.5191617186\H,0,9.2899686263,3.0723110643,6.969195878\H,0,8.4277480858,1.5370934342,7.1824476137\H,0,6.9838301659,6.4581371522,0.1475094872\H,0,6.3787387878,7.2510920825,1.6194220081\H,0,5.4860646871,5.8829689952,0.932075699\N,0,3.4791833328,0.7523265533,5.2668828558\H,0,3.1274965826,1.6651800317,4.8957478101\C,0,2.9262590174,-0.402844796,4.8563046507\H,0,2.0688087055,-0.3244053639,4.1840033605\C,0,4.5323813811,0.7961109678,6.1011715838\C,0,3.449956356,-1.6072041089,5.2931840652\H,0,4.8850652625,1.7914677749,6.3821



321633\C,0,5.0954676422,-0.3802911879,6.5649586519\C,0,4.5516487522,-1  
.596547142,6.1506617005\H,0,2.9971327031,-2.5432888887,4.9581928298\H,  
0,5.9514150999,-0.3353646832,7.2438747338\H,0,4.9836110128,-2.53939790  
64,6.5006473258\\Version=ES64L-G09RevD.01\HF=-2325.670426\S2=0.014414\  
S2-1=0.\S2A=0.000003\RMSD=4.511e-09\Dipole=2.7833959,-7.926725,2.77568  
17\Quadrupole=51.8421564,-101.2641446,49.4219882,24.6292978,106.672961  
6,-8.6281416\PG=C01 [X(C23H37B1Cl1Mo1N7O2P1)]\ \@

## Scheme S9

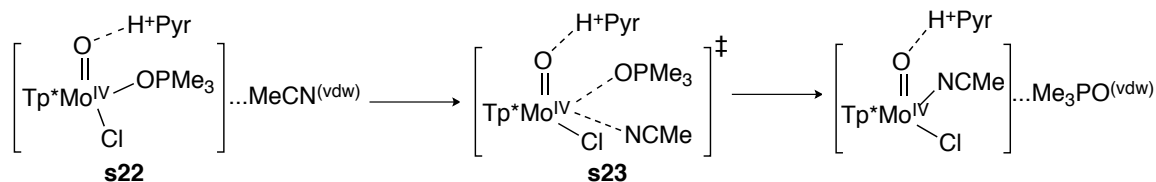

### s22

```
1\1\GINC-COMET-05-03\Stability\RM06L\Gen\C25H40B1Cl1Mo1N8O2P1(1+)\TALI
POVM\05-Aug-2017\0\#\#P M06L/chkbasis stable(opt) pop(nbo) scrf(check)
guess(read) geom(allcheck) nosym scf(fermi,xqc,maxcyc=200) int(grid=ul
trafine)\Title\1,1\C,0,5.4732484077,3.4238220023,0.1370461185\C,0,4.
6312410678,4.4275270181,-0.4683962162\N,0,3.9464314628,5.2356863571,-0
.9512762695\H,0,6.5357615049,3.7114288721,0.0623882325\H,0,5.336103965
3,2.4505232542,-0.3642237867\H,0,5.2116900955,3.3181596861,1.204152586
9\Mo,0,4.1161579271,4.1642926484,4.2107978807\O,0,2.8993734886,3.29054
78122,5.0691694012\O,0,3.136678894,4.530152844,2.3259282924\P,0,1.7939
065507,5.2446879955,1.9985596439\B,0,7.1613620863,2.8225078648,4.30871
71455\Cl,0,3.7481768691,6.5763621893,4.6652099937\N,0,6.1450598242,4.8
155471265,3.163950346\N,0,7.2487338406,4.0499271121,3.3892610071\N,0,5
.5172371529,3.9297350219,5.8752056104\N,0,6.7004062989,3.2686495017,5.
7113509565\N,0,4.8767582189,2.2737728344,3.3938216633\N,0,6.129481618,
1.8375442008,3.7053137609\C,0,2.000022275,6.9403083196,1.4441540217\C,
0,0.671161267,5.2469395391,3.4011089354\C,0,0.973254084,4.3573376044,0
.6702873987\C,0,8.3140110163,4.5380838846,2.7131086784\C,0,7.879721888
6,5.6630656695,2.0211904244\C,0,6.5187774903,5.8044315304,2.3298425012
\C,0,5.5837655741,6.8473928506,1.8421387921\C,0,9.65962744,3.913301739
9,2.764481686\C,0,7.30159021,3.0835550855,6.9093437467\C,0,6.464679631
3,3.6243819007,7.8814666489\C,0,5.3584034733,4.1476311442,7.1964715279
\C,0,4.1307334101,4.7623548747,7.7575768761\C,0,8.61533971,2.409487658
2,7.0579859604\C,0,6.299835406,0.5661341458,3.2766460361\C,0,5.1066607
897,0.1659021061,2.6793772917\C,0,4.2438107939,1.2665669254,2.76042940
52\C,0,2.8574809014,1.3883456377,2.2417218416\C,0,7.5679226526,-0.1838
21755,3.4534385496\H,0,4.8930013064,-0.8063957242,2.2333542826\H,0,7.4
439779977,-1.2234280814,3.1123280412\H,0,8.3953656054,0.2648716189,2.8
754258162\H,0,7.891841743,-0.2068816831,4.5086533344\H,0,2.4449069173,
0.394387272,2.0043296692\H,0,2.8340323074,1.9905382775,1.315556989\H,
0,2.1842889301,1.8867162657,2.9606572336\H,0,6.6403855524,3.642516252,
8.9575943116\H,0,4.3257649545,5.1789696179,8.7588054381\H,0,3.74195703
43,5.5593997163,7.1035134781\H,0,3.3267091617,4.0100580603,7.864008561
4\H,0,8.4766816223,6.3019773565,1.3690132023\H,0,10.3662055031,4.48223
34301,2.1406038708\H,0,10.0621303487,3.8849373985,3.7924493746\H,0,9.6
464512688,2.871764451,2.3975677116\H,0,1.0165178849,7.3779353834,1.200
7984409\H,0,2.4775018134,7.5321752993,2.2419102281\H,0,2.6322298818,6.
9534777583,0.5405077408\H,0,-0.2991458869,5.6882822108,3.1169697551\H,
0,1.1125285253,5.8296467064,4.2259746333\H,0,0.5097194798,4.2110742999
,3.7431758206\H,0,0.0379556839,4.8687540562,0.3875977\H,0,1.6389480752
,4.3156666074,-0.2075112286\H,0,0.7328417425,3.3312831344,0.9929143383
\H,0,8.2367077666,2.2779420026,4.3889285763\H,0,8.9038793613,2.3724529
657,8.1196991551\H,0,9.4134849265,2.9369060098,6.5066607908\H,0,8.5937
589979,1.373571419,6.6752866668\H,0,5.9021585716,7.222067453,0.8550653
376\H,0,5.5400516701,7.710623162,2.5305714567\H,0,4.5637739174,6.44823
13385,1.7584724178\N,0,3.4510960226,0.6995308706,5.7732485184\H,0,3.04
```

0229118, 1.6471260164, 5.5834233582\C, 0, 2.8120689062, -0.4069078347, 5.3558459668\H, 0, 1.8415957228, -0.2575130966, 4.8767663069\C, 0, 4.6514557199, 0.6615787236, 6.3762497347\C, 0, 3.3951045005, -1.648257763, 5.5434339389\H, 0, 5.0678740864, 1.6239181576, 6.6867675896\C, 0, 5.2799274886, -0.5546470593, 6.584761311\C, 0, 4.6462336592, -1.7223503449, 6.1586660742\H, 0, 2.8719566931, -2.5456497804, 5.2048540727\H, 0, 6.2551046543, -0.5789370735, 7.078644068\H, 0, 5.1262014595, -2.694376192, 6.3100129991\\Version=ES64L-G09RevD.01\HF=-2458.3648302\RMSD=5.637e-09\Dipole=-1.3126534, -7.2923907, 1.3492689\Quadrupole=44.1953405, -69.7285373, 25.5331968, -18.1123002, 77.0870163, -19.8925164\PG=C01 [X(C25H40B1Cl1Mo1N8O2P1)]\@

### s23 (Imaginary frequency: $61.3i \text{ cm}^{-1}$ )

1\1\GINC-COMET-02-52\Stability\RM06L\Gen\C25H40B1Cl1Mo1N8O2P1(1+)\TALI  
 POVM\05-Aug-2017\0\#\#P M06L/chkbasis stable(opt) pop(nbo) scrf(check)  
 guess(read) geom(allcheck) nosym scf(fermi,xqc,maxcyc=200) int(grid=ul  
 trafrine)\Title\1,1\Mo,0,4.1023663292,4.0628912577,3.6361827214\0,0,3  
 .0364406315,3.1741709703,4.6567696145\0,0,2.3886777666,4.0598039201,2.  
 2092775589\p,0,1.2564896691,4.9979627644,1.7770577041\B,0,7.1956252772  
 ,2.7860148107,4.0358490826\Cl,0,3.4715483805,6.4169280444,4.1077283548  
 \N,0,6.3220654947,4.9899813808,3.1902261234\N,0,7.3794042858,4.1488427  
 549,3.354325242\N,0,5.4152487726,3.7725098288,5.4779075559\N,0,6.55504  
 23098,3.0386955838,5.4104732921\N,0,5.0540052031,2.2992404984,2.748756  
 6255\N,0,6.2956746734,1.8896440629,3.1502053146\C,0,1.8065297244,6.508  
 1286197,0.9655779731\C,0,0.1676449038,5.474785515,3.1299584412\C,0,0.2  
 372450745,4.1262611014,0.5753032742\C,0,8.524584218,4.7164024996,2.906  
 9720555\C,0,8.1907818586,5.975750893,2.4293650239\C,0,6.8059510495,6.1  
 113867573,2.6242125686\C,0,5.9962509734,7.3018622052,2.2554092995\C,0,  
 9.8456350439,4.040608767,2.9674125709\C,0,7.0627167691,2.8336601483,6.  
 6502393629\C,0,6.2017183496,3.4522258759,7.5497046636\C,0,5.1791822615  
 ,4.0283550565,6.7750004694\C,0,3.970246694,4.7480538283,7.2507681582\C  
 ,0,8.3144757703,2.075082028,6.8967484599\C,0,6.6179861698,0.7199937932  
 ,2.5563601998\C,0,5.5415786166,0.3511249914,1.7534101873\C,0,4.5855138  
 99,1.3642904301,1.8922864252\C,0,3.2474008698,1.4215216332,1.254054143  
 6\C,0,7.9064864533,0.0170908401,2.7786719452\H,0,5.4597578877,-0.54769  
 14164,1.1410517793\H,0,7.9052799094,-0.9478597433,2.248211825\H,0,8.76  
 6022339,0.6039531765,2.4100105949\H,0,8.0919669239,-0.1808235744,3.848  
 9573417\H,0,3.0839090941,0.5139253314,0.6511852267\H,0,3.1394035253,2.  
 3055023864,0.6048984471\H,0,2.4403507913,1.500397481,2.0016326167\H,0,  
 6.2992900999,3.4790760709,8.6362192694\H,0,4.1473143808,5.1834926368,8.  
 2478121229\H,0,3.6755816313,5.5494368857,6.5544755211\H,0,3.098446468  
 6,4.0721723439,7.3398842081\H,0,8.8665416961,6.7133353438,1.9934332143  
 \H,0,10.6187550002,4.6816968335,2.5155240112\H,0,10.1538800784,3.82350  
 92384,4.0058214356\H,0,9.8472677852,3.0778262832,2.4265629099\H,0,0.93  
 99416197,7.1034037573,0.6303760751\H,0,2.4118355421,7.0999291027,1.670  
 5356721\H,0,2.4260078928,6.2500317978,0.0909756528\H,0,-0.6826029414,6.  
 .0758033626,2.7652667923\H,0,0.743694859,6.0582080287,3.8664431593\H,0,  
 -0.2197529659,4.565823501,3.6202664763\H,0,-0.6090815445,4.7469212479  
 ,0.2368378646\H,0,0.85408355,3.8550377128,-0.2979428908\H,0,-0.1542603  
 958,3.1994069102,1.0267230593\H,0,8.2647522788,2.2413769128,4.17916806  
 99\H,0,8.478769388,1.956698559,7.9794573265\H,0,9.1994350975,2.5856496  
 139,6.4761908685\H,0,8.2824546514,1.0671092095,6.4459155295\H,0,6.5798  
 740992,7.9493580699,1.579745041\H,0,5.7188275807,7.9020054667,3.138799  
 2076\H,0,5.0556692867,7.0263865538,1.7540807716\C,0,5.4706744001,3.883  
 4502254,-1.3553551897\C,0,5.0401840026,4.3333339297,-0.0533732731\N,0,  
 4.6889385559,4.6763295189,0.9998981416\H,0,4.7607400315,4.2083207598,-  
 2.1329458071\H,0,5.5298560183,2.7824039052,-1.3756428942\H,0,6.4655979  
 135,4.2900707311,-1.5978019448\C,0,4.5745343037,0.163576196,5.20514207

64\C,0,5.3325561638,-0.8954950301,5.6722260201\N,0,4.067665602,1.06044  
65601,6.070220537\H,0,4.3366065903,0.321967291,4.1490924914\C,0,5.5564  
334752,-1.0107044661,7.0460427901\H,0,5.7377604947,-1.6210434326,4.961  
7613399\C,0,4.2632384281,0.9756347596,7.3966777488\C,0,5.0107386217,-0  
.0688798106,7.9175164615\H,0,6.1541427016,-1.8397205294,7.4381010406\H  
,0,5.1625362745,-0.1343636782,8.9976248512\H,0,3.8003564433,1.75071811  
99,8.0104451411\H,0,3.5421101468,1.8764917393,5.6631558704\\Version=ES  
64L-G09RevD.01\HF=-2458.3351309\RMSD=2.264e-09\Dipole=-0.5823554,-5.37  
5555,-0.764663\Quadrupole=38.7477218,-70.0261523,31.2784305,-7.675547  
3,66.0647514,-30.7706044\PG=C01 [X(C25H40B1Cl1Mo1N8O2P1)]\@

## Scheme S10

I<sub>a</sub>-NNCI

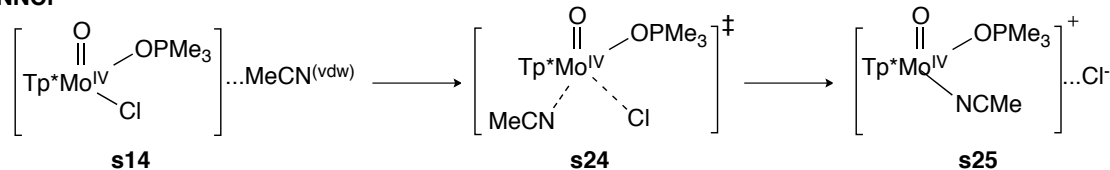

### s24 (Imaginary frequency: 58.9 i cm<sup>-1</sup>)

```

1\1\GINC-COMET-03-20\Stability\RM06L\Gen\C20H34B1Cl11Mo1N7O2P1\TALIPOVM
\04-Aug-2017\0\#\#P M06L/chkbasis stable(opt) pop(nbo) scrf(check) gues
s(read) geom(allcheck) nosym scf(fermi,xqc,maxcyc=200) int(grid=ultraf
ine)\Title\0,1\Mo,0,3.0606865517,4.9573413013,5.4468563716\0,0,2.264
8293646,3.5123701624,5.0460316459\0,0,4.747672892,4.2010433841,6.56822
67271\0,5.882077815,3.1763215066,6.3377356251\B,0,1.0238068447,7.206
5236687,6.9603779871\Cl,0,4.6141511576,4.338693873,3.3349847305\N,0,3.
4995357087,6.8395653593,6.9742113575\N,0,2.4589375144,7.6458803133,7.2
992048526\N,0,1.5678146112,6.3355728163,4.6199621992\N,0,0.8270779271,
7.1569103398,5.4249381737\N,0,1.6679498763,4.8124568054,7.2393481893\N
,0,0.8150979372,5.8127297991,7.5702977803\C,0,7.3161486991,3.841400780
4,5.4807370841\C,0,5.3344675854,1.7087146416,5.4580087113\C,0,6.458309
1327,2.6336263906,7.9548455002\C,0,2.8898861617,8.7493522949,7.9567568
706\C,0,4.2726860078,8.6491836696,8.0507798422\C,0,4.6134057665,7.4392
602525,7.4208535495\C,0,5.9783133452,6.8854514937,7.2231826485\C,0,1.9
734812937,9.8063579191,8.4560343747\C,0,-0.0201579562,7.8983871788,4.6
765897356\C,0,0.1679579891,7.5344797581,3.3462848418\C,0,1.1708784714,
6.5582629431,3.3516802111\C,0,1.7425860457,5.8339570258,2.191275764\C,
0,-0.9597915894,8.8968403724,5.2475806914\C,0,-0.0209376618,5.41532282
88,8.5604892102\C,0,0.3017386645,4.0977727253,8.8625383388\C,0,1.36869
65151,3.7574950345,8.0111525288\C,0,2.091662677,2.4640889927,7.9078207
735\C,0,-1.0451763743,6.3109600789,9.1557223126\H,0,-0.1723660873,3.46
29616775,9.6128049413\H,0,-1.6513901551,5.7597507934,9.8917937042\H,0,
-0.5901783565,7.1744673502,9.6742092062\H,0,-1.7295028752,6.7236026424
,8.3931946509\H,0,2.0480853533,1.9139559336,8.8626200466\H,0,3.1469461
886,2.6280543781,7.63840187\H,0,1.6581795193,1.811737064,7.1280453785\
H,0,-0.3640543037,7.9279957011,2.478976106\H,0,1.3035911888,6.21083241
07,1.2531123499\H,0,2.8400344825,5.9336139092,2.1471683234\H,0,1.54477
80932,4.748816684,2.2504637955\H,0,4.9520971038,9.3635511954,8.5189978
722\H,0,2.5501555133,10.6117501098,8.937716395\H,0,1.376283699,10.2593
009719,7.644983856\H,0,1.2553264143,9.4160180982,9.1994454886\H,0,8.07
56102638,3.0536292247,5.3385847007\H,0,6.9862911781,4.2246432842,4.501
0887411\H,0,7.7615297795,4.6609634302,6.0681565707\H,0,6.1432540256,0.
9597783198,5.4114269912\H,0,5.0323345074,2.007950237,4.4408604774\H,0,
4.4660566211,1.270102549,5.9773987236\H,0,7.2818844182,1.9066194445,7.
8595344565\H,0,6.8151363606,3.5013467851,8.5338068077\H,0,5.6293341144
,2.1630861833,8.5089154397\H,0,0.2311545052,7.9888458733,7.4323170444\
H,0,-1.5541914459,9.3561063206,4.4421775004\H,0,-0.4338991938,9.706930
9711,5.7822505382\H,0,-1.6610569899,8.4416208229,5.968976441\H,0,6.736
1804889,7.6627757833,7.4165253389\H,0,6.1132039558,6.5136008696,6.1941
028345\H,0,6.1856688365,6.0418162211,7.9048917624\C,0,4.2558659857,9.2
361023277,2.9818460091\C,0,4.3051602471,8.0423861763,3.7914151324\N,0,
4.3215164201,7.0682551455,4.4247742123\H,0,3.2672417862,9.3222948075,2
.5004104606\H,0,5.0249334925,9.2042431841,2.1932100236\H,0,4.422492809
9,10.1347373327,3.5974423217\Version=ES64L-G09RevD.01\HF=-2209.803249

```

8\RMSD=3.097e-09\Dipole=1.509195,2.1501372,1.7177356\Quadrupole=-10.65  
75578,23.1526178,-12.4950601,12.0293749,31.2732212,21.9000695\PG=C01 [X(C20H34B1Cl1Mo1N7O2P1)]\@

## s25

```
1\1\GINC-COMET-08-18\Stability\RM06L\Gen\C20H34B1Cl1Mo1N7O2P1\TALIPOVM
\03-Aug-2017\0\#\#P M06L/chkbasis stable(opt) pop(nbo) scrf(check) gues
s(read) geom(allcheck) nosym scf(fermi,xqc,maxcyc=200) int(grid=ultraf
ine)\Title\0,1\Mo,0,2.91272706,5.29756692,5.5504150368\0,0,2.3596355
267,4.011645325,4.5844554634\0,0,4.5217585299,4.3951096417,6.658973392
3\P,0,5.7701406057,3.531469189,6.3328755936\B,0,0.7566724234,7.2514985
539,7.1747008501\Cl,0,5.4276724187,3.536929265,2.0850881642\N,0,3.2600
29126,7.2250243067,6.9370625694\N,0,2.1578810055,7.8339154725,7.452618
6635\N,0,1.3970268158,6.6831409342,4.8063689406\N,0,0.5098944832,7.279
1544356,5.6503266009\N,0,1.6047655467,4.872482901,7.2425566611\N,0,0.7
137770908,5.7981066767,7.6964412715\C,0,6.9806332354,4.3025564644,5.25
1196667\C,0,5.3274722534,1.9968010028,5.5168251833\C,0,6.5746229715,3.
156438791,7.8938720159\C,0,2.5118249217,8.9182953706,8.1811059726\C,0,
3.8986757185,9.0118227663,8.132703859\C,0,4.3274478669,7.9338154193,7.
3437974082\C,0,5.717010307,7.5679166194,6.9685864\C,0,1.5265569626,9.7
850524197,8.8754123755\C,0,-0.4088546361,7.9736015396,4.9406878625\C,0
,-0.1109700767,7.8002898333,3.5924376817\C,0,1.0341800976,6.9931452211
,3.5474157614\C,0,1.7841647406,6.5257458342,2.3526195154\C,0,-1.498444
1408,8.7556378735,5.5764179603\C,0,-0.0539396302,5.261791288,8.6713575
777\C,0,0.3462233649,3.938431816,8.8364046559\C,0,1.3916291261,3.73276
88551,7.9278628985\C,0,2.1698308593,2.4931102364,7.6807759423\C,0,-1.1
08948282,6.0254716695,9.3832160653\H,0,-0.0741018413,3.2100458288,9.53
08457263\H,0,-1.633509969,5.3707253178,10.0961142026\H,0,-0.691673041,
6.876010492,9.9505861803\H,0,-1.8587134104,6.4416159495,8.6878155102\H
,0,1.6617179506,1.62418658,8.1278385828\H,0,3.1802209707,2.5545113785,
8.1214489735\H,0,2.2932708529,2.3048242362,6.6009027157\H,0,-0.6603933
454,8.2107445376,2.7443727717\H,0,2.5767910428,7.2435804149,2.07096968
6\H,0,2.2694811999,5.5502176472,2.5178522706\H,0,1.1115245939,6.435545
1943,1.4843206091\H,0,4.521121456,9.7658362168,8.6164830331\H,0,2.0446
648383,10.6003767635,9.4037024846\H,0,0.8084410319,10.2415875301,8.171
8013825\H,0,0.9329561777,9.2243350855,9.6186908271\H,0,7.913288342,3.7
118882043,5.2837527128\H,0,6.5919787591,4.2841218439,4.2109898928\H,0,
7.2086352303,5.3332777452,5.5683406682\H,0,6.2082871716,1.3339866761,5
.4648199119\H,0,5.0090360022,2.2310257611,4.4823746297\H,0,4.522604529
7,1.4785044862,6.0618192736\H,0,7.4572628519,2.5147423901,7.7390708763
\H,0,6.8944736723,4.0943597408,8.3778861105\H,0,5.8675637769,2.6403972
93,8.563869519\H,0,-0.0871985673,7.9093166479,7.7360435455\H,0,-2.1718
257189,9.1620154802,4.8059483007\H,0,-1.1084600318,9.6058661978,6.1636
189572\H,0,-2.1013142182,8.1397487159,6.2662612602\H,0,6.4341302921,7.
9271280747,7.7244440574\H,0,6.0163778959,8.0131758073,6.0012160752\H,0
,5.8206288573,6.4760270039,6.8780138258\C,0,6.1387465215,6.8925869083,
2.5196035842\C,0,5.1692856044,6.5158740649,3.5063957146\N,0,4.38908955
93,6.1801261231,4.3015287028\H,0,5.7993247336,7.7587105358,1.926656372
5\H,0,6.2714115531,6.0073003234,1.8669579008\H,0,7.1021683833,7.137170
1617,2.9989241422\Version=ES64L-G09RevD.01\HF=-2209.8192296\RMSD=3.23
7e-09\Dipole=0.2667258,3.2500503,5.2504851\Quadrupole=-37.6823952,9.68
41729,27.9982222,18.9370728,44.1509562,60.9162336\PG=C01 [X(C20H34B1Cl
1Mo1N7O2P1)]\@
```

## Scheme S11

**I<sub>a</sub>-penta (Tp-open)**

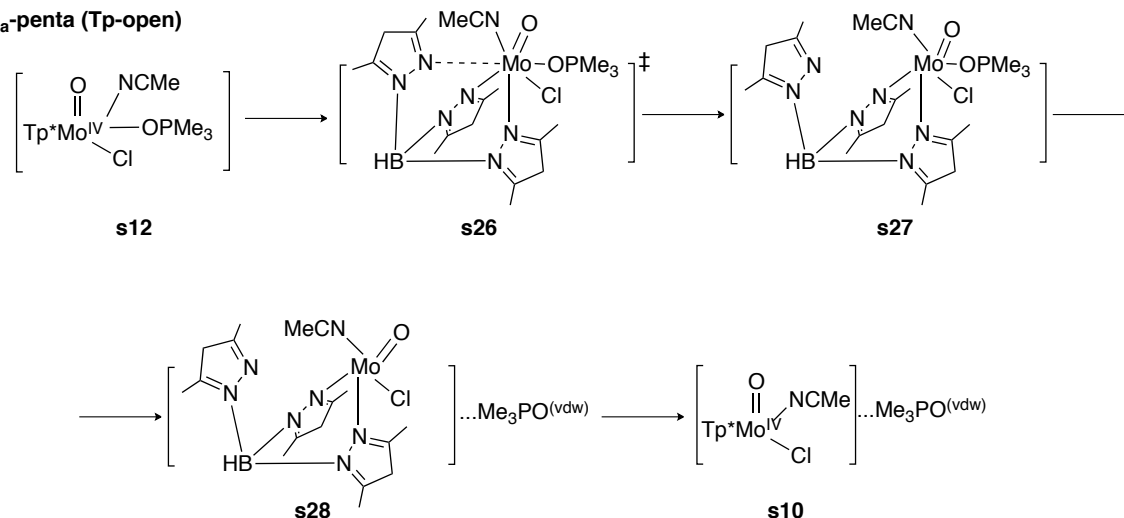

### s26 (Imaginary frequency: 20.6i cm<sup>-1</sup>)

```

1\1\GINC-COMET-08-38\Stability\RM06L\Gen\C20H34B1Cl1Mo1N7O2P1\TALIPOVM
\02-Aug-2017\0\#\#P M06L/chkbasis stable(opt) pop(nbo) scrf(check) gues
s(read) geom(allcheck) nosym scf(fermi,xqc,maxcyc=200) int(grid=ultraf
ine)\Title\0,1\Mo,0,3.0429415947,5.1648619411,4.5502496431\0,0,2.081
5370353,4.5672916715,3.2830580061\0,0,4.522367266,4.9060233485,6.22694
14091\P,0,5.7842979088,4.1598781224,6.6733117271\B,0,1.3484275791,7.00
83008464,6.8874439668\Cl,0,5.0111206128,6.1422032566,3.3455608346\N,0,
3.7412985536,7.6224478348,6.374104712\N,0,2.8073456861,7.2856849536,7.
2957676723\N,0,1.7959445926,6.9927768684,4.4066852076\N,0,1.1295704055
,7.5310843865,5.4625498269\N,0,1.6811080271,4.5726480415,6.1739031773\
N,0,1.0185503024,5.487840813,6.9415565533\C,0,7.0820180827,4.096995135
5,5.4255437396\C,0,5.4409125808,2.4651395416,7.1909261883\C,0,6.535214
078,4.9349254717,8.1127088738\C,0,3.3284474386,7.2896550488,8.54989754
15\C,0,4.6627749058,7.6580280153,8.4287714485\C,0,4.8702400183,7.84413
14747,7.047987733\C,0,6.1334495826,8.1818077721,6.3362966328\C,0,2.528
5367783,6.9449253138,9.7525624455\C,0,0.3812790831,8.5841310517,5.0563
889791\C,0,0.5591045138,8.7123987363,3.6844615774\C,0,1.4508200666,7.6
935717167,3.3131136562\C,0,1.9289044322,7.3559911515,1.9486472042\C,0,
-0.4474452281,9.3970945865,5.9822002136\C,0,0.0990156047,4.8642280008,
7.7136590205\C,0,0.1718742425,3.5025515477,7.435645615\C,0,1.173045077
2,3.3600542228,6.4686980512\C,0,1.6240296154,2.10710354,5.812560667\C,
0,-0.8140639879,5.5706946892,8.6486016168\H,0,-0.4364732993,2.71102496
02,7.8754008258\H,0,-1.468411375,4.8417980036,9.1524228085\H,0,-0.2710
679603,6.1324098177,9.4277582238\H,0,-1.458657015,6.2978590767,8.12410
18687\H,0,1.5726643337,2.1778093349,4.7124863906\H,0,0.9928512104,1.26
32485743,6.1341152227\H,0,2.6689126737,1.8613797344,6.0695840302\H,0,0.
0941962551,9.4509120545,3.0297187268\H,0,1.7814303602,8.2108253984,1.
2681960498\H,0,2.9956966445,7.0776089124,1.9511760618\H,0,1.3739837093
,6.49643698,1.5303185508\H,0,5.3868663842,7.7702458927,9.2393885823\H,
0,3.1344033065,7.0554121231,10.6664281223\H,0,1.6378501865,7.591280641
4,9.8608759188\H,0,2.1628400452,5.9009029411,9.7231209138\H,0,7.423715
3673,5.1204932983,5.2022361265\H,0,7.9361846142,3.5029043166,5.7927029
568\H,0,6.703352071,3.6602288529,4.489072648\H,0,6.3438977258,1.997363
7733,7.6179588389\H,0,5.0902740338,1.8509840523,6.3475961675\H,0,4.651

```

9207989, 2.4806378118, 7.9620558226\H, 0, 7.4054354066, 4.3446974679, 8.4475833644\H, 0, 6.8657461037, 5.9565488661, 7.8672131306\H, 0, 5.8007870303, 4.9955942309, 8.9321093333\H, 0, 0.5819323359, 7.5665038974, 7.6478109839\H, 0, -0.9742912863, 10.1861664249, 5.4227036988\H, 0, 0.1605219586, 9.8855420311, 6.7640501007\H, 0, -1.2061522223, 8.7874987351, 6.5044634007\H, 0, 6.9283763014, 8.4763055593, 7.042062322\H, 0, 5.9945254748, 9.0090909096, 5.617529738\H, 0, 6.4967410915, 7.3214628554, 5.7432397489\C, 0, 5.1376146333, 0.9837760565, 3.2090484304\C, 0, 4.5452098057, 2.1892875279, 3.7293953824\N, 0, 4.0747172929, 3.1549106701, 4.1728665626\H, 0, 5.092032863, 0.9779786609, 2.1078708193\H, 0, 4.6087674391, 0.0928340631, 3.5866157547\H, 0, 6.1960812524, 0.9188903921, 3.5117774322\\Version=ES64L-G09RevD.01\HF=-2209.80482\RMSD=4.602e-09\Dipole=2.0253002, -5.1088322, 3.0016223\Quadrupole=35.5608042, -90.3244368, 54.7636326, -34.1316687, 41.1571902, -16.6489849\PG=C01 [X(C20H34B1Cl1Mo1N7O2P1)]\\@

### s27

1\1\GINC-COMET-05-10\Stability\RM06L\Gen\C20H34B1Cl1Mo1N7O2P1\TALIPOVM\06-Aug-2017\0\#\#P M06L/chkbasis stable(opt) pop(nbo) scrf(check) gues s(read) geom(allcheck) nosym scf(fermi,xqc,maxcyc=200) int(grid=ultrafine)\Title\0, 1\Mo, 0, -1.2653635185, -0.8018019992, 0.5732841715\0, 0, -1.9271090555, -2.3188285178, 0.9738157192\0, 0, -0.7830692717, 1.1575878984, -0.3221246652\P, 0, -1.02763577, 2.6703422225, -0.1355067916\B, 0, 2.1310882767, -0.9318300651, -0.4693374911\C1, 0, -2.1000620486, 0.6342730069, 2.4773380799\N, 0, 3.0154617383, 1.2227702639, 0.3406434201\N, 0, 2.2999357853, 0.603230416, -0.633874664\N, 0, 0.6279666029, -1.146467524, 1.615490113\N, 0, 1.8460867826, -1.2779311642, 1.0040182266\N, 0, -0.2707666925, -1.4867093506, -1.2634096269\N, 0, 1.0876615259, -1.5553317898, -1.4214276342\C, 0, -2.7511300191, 3.100007309, 0.1605104227\C, 0, -0.5972920019, 3.5810365342, -1.6252658664\C, 0, -0.0291553905, 3.3103366611, 1.2114461071\C, 0, 2.1558336877, 1.4105794422, -1.7194042973\C, 0, 2.801932985, 2.6062359651, -1.422884756\C, 0, 3.319405807, 2.4368532699, -0.1229315764\C, 0, 4.0742596106, 3.4081073087, 0.716645202\C, 0, 1.3990774755, 1.0559509856, -2.9502842094\C, 0, 2.7750872364, -1.6760942147, 1.90001366\C, 0, 2.1347149124, -1.8470151418, 3.1213658542\C, 0, 0.7949828153, -1.515664203, 2.9081840148\C, 0, -0.2937137046, -1.6228700818, 3.9131665685\C, 0, 4.2125463575, -1.8585992793, 1.5804579562\C, 0, 1.3826292327, -2.2135586098, -2.5692563963\C, 0, 0.1839613229, -2.5820198481, -3.1650039553\C, 0, -0.8266410926, -2.1121332818, -2.3203853996\C, 0, -2.2906553852, -2.2726696123, -2.5117044313\C, 0, 2.7633749221, -2.4622255839, -3.05664184\H, 0, 0.0583053025, -3.1348011223, -4.0967230721\H, 0, 2.7262142987, -2.9408785083, -4.0482373704\H, 0, 3.3554567347, -1.5353521784, -3.1466785788\H, 0, 3.3255175286, -3.1288644149, -2.3794466829\H, 0, -2.7931873887, -2.6375969494, -1.6006383547\H, 0, -2.484624957, -2.9909446274, -3.3242741527\H, 0, -2.7730460834, -1.3195146202, -2.7901867148\H, 0, 2.584844091, -2.1869941297, 4.0549512529\H, 0, 0.0389877318, -2.2668949646, 4.7439256396\H, 0, -0.5716394841, -0.6417345604, 4.3308997161\H, 0, -1.2130198471, -2.0519231906, 3.4833240708\H, 0, 2.8689877866, 3.4854785159, -2.0686520553\H, 0, 1.3257871471, 1.9370793894, -3.6096112784\H, 0, 1.8802385575, 0.2559327041, -3.5414626362\H, 0, 0.3729992276, 0.7189986226, -2.7173473899\H, 0, -3.14111015953, 2.532642693, 1.019861136\H, 0, -2.8351074665, 4.1822596331, 0.3584866425\H, 0, -3.343713701, 2.8653525068, -0.7393764759\H, 0, -0.8785711548, 4.6417813206, -1.5118614793\H, 0, -1.1450853963, 3.1588918185, -2.4843235071\H, 0, 0.4842375742, 3.5148561124, -1.8193991401\H, 0, -0.0894410893, 4.4097065424, 1.2769776792\H, 0, -0.3787280331, 2.8600024069, 2.1551035081\H, 0, 1.0185265408, 3.0061776632, 1.0387072196\H, 0, 3.1876109477, -1.4704628066, -0.7425189833\H, 0, 4.7670354588, -2.1251192471, 2.4945475496\H, 0, 4.6485798101, -0.933725318, 1.1655876634\H, 0, 4.3782926584, -2.6579999975, 0.8375238965\H, 0, 4.972019159, 3.793148606, 0.2003273262\H, 0, 4.4005059575, 2.932893085, 1.656557571



4\H,0,3.4629783429,4.2909768363,0.9828440806\C,0,-5.5624817,0.41672763  
58,-1.159155648\C,0,-4.2479145809,0.0459457942,-0.7050653556\N,0,-3.18  
25149508,-0.2569227478,-0.3543990872\H,0,-5.5942262945,0.4825847859,-2  
.259484687\H,0,-5.8580944128,1.3914458864,-0.7368534085\H,0,-6.2975757  
817,-0.3368799733,-0.8332705795\\Version=ES64L-G09RevD.01\HF=-2209.814  
4616\RMSD=5.140e-09\Dipole=-2.8118384,2.7258087,-3.7339735\Quadrupole=  
10.8869331,1.1525728,-12.0395059,-15.8034064,17.7575597,-0.0974232\PG=  
C01 [X(C20H34B1Cl1Mo1N7O2P1)]\@\

## s28

I\I\GINC-COMET-05-11\Stability\RM06L\Gen\C20H34B1Cl1Mo1N7O2P1\TALIPOVM  
\05-Aug-2017\0\#\#P M06L/chkbasis stable(opt) pop(nbo) scrf(check) gues  
s(read) geom(allcheck) nosym scf(fermi,xqc,maxcyc=200) int(grid=ultraf  
ine)\Title\0,1\Mo,0,-1.0659325857,-1.1029643413,0.6015838789\O,0,-1.  
9466855227,-2.3694074761,1.2741287018\O,0,-2.7530945321,5.9176348499,-  
0.8732903154\O,0,-2.2924329287,4.6054065225,-0.2828594786\O,0,2.155841  
7756,-1.2129771304,-0.558239518\Cl,0,-1.1836779159,1.0050782235,1.8499  
016069\N,0,2.5673573794,1.0156479903,0.4124493505\N,0,1.9495486284,0.3  
243982809,-0.5819744136\N,0,0.8185989184,-1.5124744175,1.5674136099\N,  
0,1.996216618,-1.6873041068,0.9022724345\N,0,-0.2079148162,-1.97359456  
9,-1.1796826792\N,0,1.1318172263,-1.9429456771,-1.4573411395\C,0,-3.54  
32668916,3.7862590529,0.7370805436\C,0,-0.837223155,4.750279847,0.7832  
18476\C,0,-1.8241844237,3.3754067233,-1.5288222741\C,0,1.394869603,1.1  
761503572,-1.4967048107\C,0,1.6580496098,2.4651881742,-1.0523274609\C,  
0,2.3916834727,2.3082513652,0.1423163448\C,0,2.9173317271,3.3575851687  
,1.0586896851\C,0,0.6720936931,0.7636670449,-2.7313317545\C,0,2.963323  
7502,-2.0457506881,1.7736645277\C,0,2.3814980822,-2.1425361091,3.03516  
01154\C,0,1.0374961603,-1.7930681397,2.8690194749\C,0,-0.0505033648,-1  
.7871889153,3.8775021921\C,0,4.37979598,-2.2424350327,1.3791743265\C,0  
,1.36807632,-2.5798767085,-2.6261670551\C,0,0.1503121153,-3.0516391902  
,-3.1054470587\C,0,-0.8159440293,-2.6489484981,-2.1803722095\C,0,-2.27  
74443013,-2.9097980583,-2.2273343783\C,0,2.7159958171,-2.6968843881,-3  
2.2350729232\H,0,-0.0136814564,-3.6272540477,-4.0168247775\H,0,2.647160  
9555,-3.2211380923,-4.2007896019\H,0,3.1754950267,-1.709169763,-3.4141  
53272\H,0,3.4130524568,-3.258927172,-2.5897517268\H,0,-2.7267063022,-2  
.9689389943,-1.2233119748\H,0,-2.4758950074,-3.8606887135,-2.747486896  
2\H,0,-2.8111730806,-2.1223700465,-2.789403752\H,0,2.8761939314,-2.431  
1898433,3.9632289922\H,0,0.367751226,-1.7795608818,4.8965415172\H,0,-0  
.7087928213,-0.9102802087,3.7597295242\H,0,-0.688020893,-2.68603315,3.  
787336255\H,0,1.3591558341,3.3937532114,-1.5438683602\H,0,0.4133535756  
,1.6576540681,-3.3218769747\H,0,1.2775333142,0.1067392755,-3.381568852  
7\H,0,-0.2725453689,0.2258293289,-2.5238452102\H,0,-4.4536051358,3.617  
5355967,0.1364754703\H,0,-3.1764711454,2.8200260174,1.1276004428\H,0,-  
3.8119291365,4.4387906558,1.5854706884\H,0,-0.5188951951,3.7641483512,  
1.1638946399\H,0,-1.0671799682,5.4111031116,1.6366398422\H,0,-0.006916  
0323,5.2011004342,0.2128142222\H,0,-1.4454959102,2.4487014172,-1.06146  
97383\H,0,-2.6935738854,3.1437027299,-2.1682229016\H,0,-1.0346936943,3  
.7957110825,-2.1749628794\H,0,3.2675181346,-1.5227910088,-0.9390871683  
\H,0,4.9697134213,-2.5806684552,2.2453275353\H,0,4.8275935453,-1.30438  
10105,1.0064059804\H,0,4.4886728269,-2.9917205151,0.5764365129\H,0,3.4  
439500968,4.1588467558,0.5107785022\H,0,3.6202588977,2.9190415964,1.78  
60469076\H,0,2.1093573005,3.8472501659,1.6340116107\C,0,-4.5842722805,  
0.6820117404,-2.0519594513\C,0,-3.5102054099,0.1998467642,-1.228034314  
7\N,0,-2.64271058,-0.230172386,-0.5839683139\H,0,-5.3673520356,-0.0917  
291896,-2.1178262419\H,0,-4.2213393919,0.8925013815,-3.0717232162\H,0,  
-5.0337793928,1.5971804327,-1.6332131778\\Version=ES64L-G09RevD.01\HF=  
-2209.7948469\RMSD=1.237e-09\Dipole=-1.7579996,-3.3134385,-3.1631419\Q

uadrupole=19.0541519, -33.528267, 14.474115, 5.9842029, 13.0801052, 11.4440198\PG=C01 [X(C20H34B1Cl1Mo1N7O2P1)]\ \@

## Scheme S12

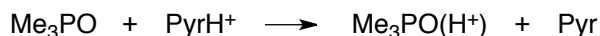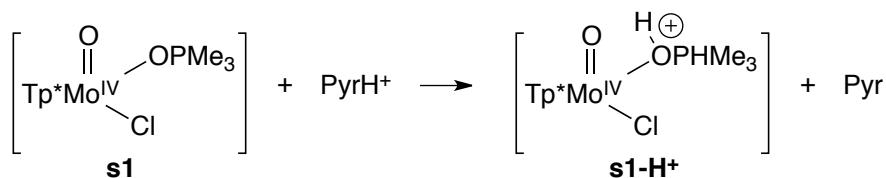

### Me<sub>3</sub>PO

```
1\1\GINC-JOKER-C8\Stability\RM06L\Gen\C3H901P1\SOFIBALI\24-Feb-2017\0\
\#P M06L/chkbasis stable(opt) pop(nbo) scrf(check) guess(read) geom(al
lcheck) nosym scf(fermi,xqc,maxcyc=200) int(grid=ultrafine)\Title\0,
1\0,0,3.2281644678,4.7284939737,2.2524629079\P,0,1.8696344252,5.296652
5601,1.9184201838\C,0,1.8431028169,7.1044737761,1.8194024896\C,0,0.588
969584,4.8739899119,3.1269956092\C,0,1.2171270217,4.7309474885,0.32677
41574\H,0,0.8393870074,7.4904714887,1.5730319107\H,0,2.1615679053,7.53
02673243,2.78595954\H,0,2.5539690891,7.4405572117,1.0456209036\H,0,-0.
3904637634,5.3066215423,2.8607315632\H,0,0.8849927962,5.2476330194,4.1
21889968\H,0,0.4892914571,3.7770111116,3.1882653254\H,0,0.2241516101,5
.1604913183,0.1107723326\H,0,1.9128186263,5.0194064175,-0.4793147887\H
,0,1.1360069563,3.630742856,0.3325078976\Version=ES64L-G09RevE.01\HF=
-536.05441\RMSD=2.493e-09\Dipole=-1.849794,0.7735321,-0.4550932\Quadru
pole=-15.8251185,17.0081227,-1.1830042,-13.6135795,-9.5878303,-1.21860
96\PG=C01 [X(C3H901P1)]\ \@
```

### Me<sub>3</sub>PO(H<sup>+</sup>)

```
1\1\GINC-JOKER-C7\Stability\RM06L\Gen\C3H1001P1(1+)\SOFIBALI\29-Oct-20
17\0\0\#P M06L/chkbasis stable(opt) pop(nbo) scrf(check) guess(read) ge
om(allcheck) scf(fermi,xqc,maxcyc=200) int(grid=ultrafine)\Title\1,1
\0,0,3.3488761735,4.7353746501,1.9469094854\P,0,1.831495187,5.18621947
38,1.6578140867\C,0,1.9710567312,6.9468570215,1.4679308836\C,0,0.78680
97726,4.7639088587,3.0397469185\C,0,1.2320262484,4.4184992118,0.164263
0118\H,0,0.9800544827,7.3832243838,1.262074741\H,0,2.3773398492,7.3855
100259,2.3930041274\H,0,2.6501616944,7.1738482785,0.6309515799\H,0,-0.
2359243384,5.1377337427,2.8683462437\H,0,1.1898170226,5.2179758268,3.9
589971558\H,0,0.7464897089,3.6696615585,3.1644036454\H,0,0.218791917,4
.7849539384,-0.0684931271\H,0,1.9068222675,4.6617059179,-0.6718670526\
H,0,1.1915439843,3.3243777506,0.2899673292\H,0,3.495962891,3.778739694
3,2.0845963532\Version=ES64L-G09RevE.01\State=1-A'\HF=-536.486784\RMS
D=1.505e-09\Dipole=-0.6377916,-0.5254014,-0.035638\Quadrupole=-2.45727
88,2.6595492,-0.2022704,-1.6481586,-0.1433505,-0.6050196\PG=CS [SG(C1H
201P1),X(C2H8)]\ \@
```

### PyrH<sup>+</sup>

```
1\1\GINC-JOKER-C8\Stability\RM06L\Gen\C5H6N1(1+)\SOFIBALI\07-Feb-2017\
0\0\#P M06L/chkbasis stable(opt) pop(nbo) scrf(check) guess(read) geom(
allcheck) nosym scf(fermi,xqc,maxcyc=200) int(grid=ultrafine)\Title\
1,1\H,0,-0.0147942353,-0.5160697853,0.703748899\C,0,-0.6157719212,0.36
```

5356355,0.9477638567\C,0,-1.9824814189,0.2313630146,1.1967557961\H,0,-  
2.4785533712,-0.7409923562,1.154755379\C,0,-2.7224418175,1.3588528417,  
1.5040119698\H,0,-3.7934120746,1.3500997921,1.712943446\N,0,-2.1092545  
285,2.556312772,1.5555494595\C,0,-0.7942322286,2.7248314793,1.31996692  
42\H,0,-0.4120464845,3.7445596879,1.3890857101\C,0,-0.0160571683,1.624  
1560195,1.0094434327\H,0,1.0511114847,1.7581724613,0.8184243084\H,0,-2  
.6715462363,3.379807718,1.7847908185\\Version=ES64L-G09RevE.01\HF=-248  
.5030676\RMSD=2.145e-09\Dipole=-0.5563695,0.8146408,0.225747\Quadrupol  
e=3.0906832,7.2461454,-10.3368286,-12.3371314,-10.5510402,11.3699452\PG  
=C01 [X(C5H6N1)]\\@

## Pyr

1\1\GINC-JOKER-C8\Stability\RM06L\Gen\C5H5N1\SOFIBALI\29-Oct-2017\0\\#  
P M06L/chkbasis stable(opt) pop(nbo) scrf(check) guess(read) geom(allc  
heck) scf(fermi,xqc,maxcyc=200) int(grid=ultrafine)\\Title\\0,1\N,0,5.  
3969326412,4.2959311698,0.1613190131\C,0,6.3755567456,3.3898103365,0.2  
220583292\H,0,6.2362185264,2.5692816839,0.9411190573\C,0,5.5430987659,  
5.3018549465,-0.70424565\C,0,7.5276166281,3.4421140729,-0.5640226931\H  
,0,4.726223387,6.037538506,-0.7391032965\C,0,6.6533084435,5.4502830047  
, -1.5368948022\C,0,7.668240764,4.4974649584,-1.4638785579\H,0,8.298265  
1948,2.6692938253,-0.470770947\H,0,6.7187244959,6.2972874937,-2.228378  
9829\H,0,8.5573783763,4.5763583811,-2.1000865092\\Version=ES64L-G09Rev  
E.01\State=1-A1\HF=-248.0609032\RMSD=6.455e-09\Dipole=0.8857475,0.0785  
926,-0.6337822\Quadrupole=-0.9480458,1.9874407,-1.0393948,-1.8386013,0  
.4946137,-2.1414176\PG=C02V [C2(H1C1N1),SGV(C4H4)]\\@

## s1-H+

1\1\GINC-JOKER-C8\Stability\RM06L\Gen\C18H32B1Cl1Mo1N6O2P1(1+)\SOFIBAL  
I\29-Oct-2017\0\\#P M06L/chkbasis stable(opt) pop(nbo) scrf(check) gue  
ss(read) geom(allcheck) nosym scf(fermi,xqc,maxcyc=200) int(grid=ultra  
fine)\\Title\\1,1\Mo,0,4.1920162697,3.9195938949,3.9524251907\O,0,2.87  
79224011,2.9990307291,4.5214985671\O,0,3.1081590173,4.4992311667,1.970  
9677366\O,0,1.6629124342,5.2787736999,1.7336053322\B,0,7.2996566718,2.  
8131815276,4.0452390929\Cl,0,3.7142949012,6.2790119328,4.5505155148\N,  
0,6.1933823631,4.808114123,2.9633002543\N,0,7.3454295367,4.1449382168,  
3.2718982259\N,0,5.4779889297,3.6019601833,5.6145252396\N,0,6.71710661  
55,3.0524364564,5.4566794488\N,0,5.1042871269,2.158154615,3.003081286\  
N,0,6.3989401847,1.8325622356,3.2689144737\C,0,1.9526237008,7.01649360  
35,1.5053691619\C,0,0.7142927628,4.9481605879,3.1944009114\C,0,0.92462  
15358,4.5561369022,0.2861869761\C,0,8.4217455679,4.8105474931,2.794417  
3248\C,0,7.9487228109,5.944954439,2.1451373181\C,0,6.5536436734,5.9079  
0504,2.2744702778\C,0,5.5825993427,6.9053306839,1.7581267167\C,0,9.816  
5468341,4.3362377527,2.9771554181\C,0,7.2883454767,2.8568922015,6.6648  
014742\C,0,6.374035281,3.2673979322,7.6333999658\C,0,5.2515418459,3.73  
03518232,6.9401144566\C,0,3.9591641422,4.2170267477,7.4792445274\C,0,8  
.6554843216,2.3051111908,6.8324634435\C,0,6.7189107332,0.6621819703,2.  
6704642185\C,0,5.5800289021,0.2081017343,2.0143261276\C,0,4.5892308305  
,1.1732670428,2.2411240811\C,0,3.188304191,1.1738463308,1.7449408846\C  
,0,8.0715513368,0.0572190774,2.7525617101\H,0,5.479199872,-0.714668962  
9,1.4419051361\H,0,8.0848245753,-0.9122892145,2.2311726007\H,0,8.83950  
3002,0.7007279694,2.2878434417\H,0,8.3860067213,-0.113054469,3.7970611  
317\H,0,2.8148207016,0.1418941354,1.6454747613\H,0,3.1098396723,1.6272  
038636,0.738643258\H,0,2.5067753013,1.715593585,2.4202137081\H,0,6.509  
7913369,3.2329830068,8.7148056862\H,0,4.0520816805,4.4553969667,8.5504  
356608\H,0,3.60645679,5.1130360118,6.9420919781\H,0,3.1706803163,3.448  
9462917,7.3747041129\H,0,8.5431692195,6.704828365,1.6362051039\H,0,10.  
521437229,5.0511348685,2.5252904962\H,0,10.0802091158,4.2295812114,4.0

439571736\H,0,9.9848350185,3.3518649492,2.5059281571\H,0,0.9748370121,  
7.5185918233,1.4034089374\H,0,2.4825550852,7.4146011203,2.3859443663\H  
,0,2.539096607,7.1971841658,0.5907279704\H,0,-0.2732347828,5.427089718  
2,3.0785678364\H,0,1.2269269663,5.3724775024,4.0732845695\H,0,0.583105  
944,3.8621713535,3.3226477187\H,0,-0.055454394,5.032376351,0.117786955  
2\H,0,1.5545611118,4.7334856669,-0.6005436208\H,0,0.7764628494,3.47413  
04216,0.4315713644\H,0,8.411890191,2.3539670376,4.1456866112\H,0,8.900  
7883115,2.2207294818,7.902248033\H,0,9.4195023537,2.946122135,6.358801  
9167\H,0,8.7534423654,1.3026130565,6.3804639744\H,0,6.0141625111,7.457  
9754289,0.9080878468\H,0,5.3020614946,7.6438339208,2.5297063293\H,0,4.  
6522350928,6.4287047445,1.4176282727\H,0,3.5272929874,4.1476581591,1.1  
590741552\\Version=ES64L-G09RevE.01\HF=-2077.5889649\RMSD=3.871e-09\Di  
pole=-4.4787535,0.9875036,-5.3359799\Quadrupole=18.5200825,28.1218522,  
-46.6419347,24.44412,18.5205603,2.501722\PG=C01 [X(C18H32B1Cl1Mo1N6O2P  
1)]\@
